# Supplementary material for: Mutation of CRYAB encoding a conserved mitochondrial chaperone and antiapoptotic protein causes hereditary optic atrophy
Source: PubMed Central journal article supplement (PMC11721302; doi:10.1172/jci.insight.182209), 2024-11-19

# Unedited gel images

Full unedited gel for Figure 1D

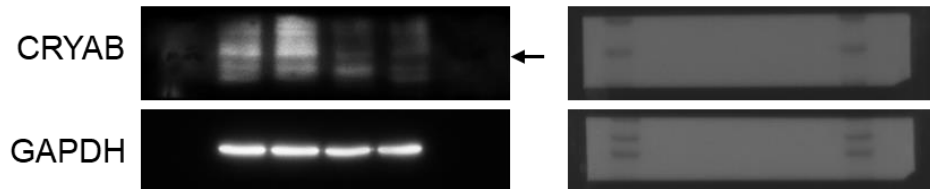

Full unedited gel for Figure 1D

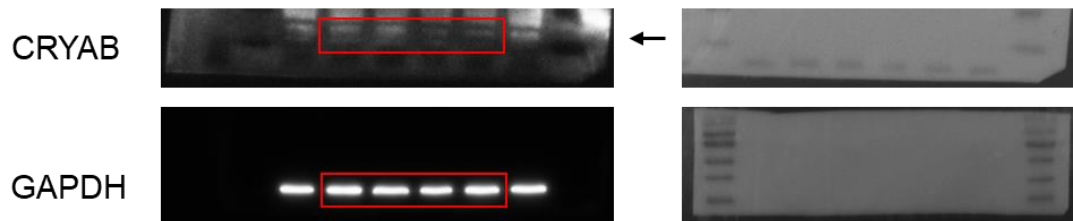

Full unedited gel for Figure 1E

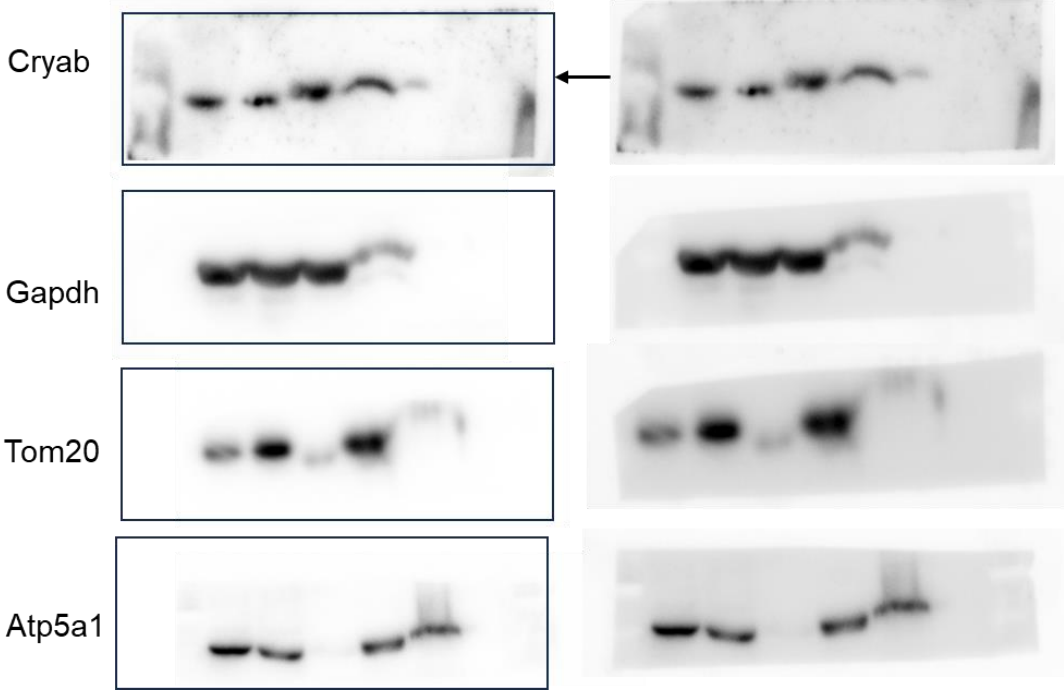

Full unedited gel for Figure 2C

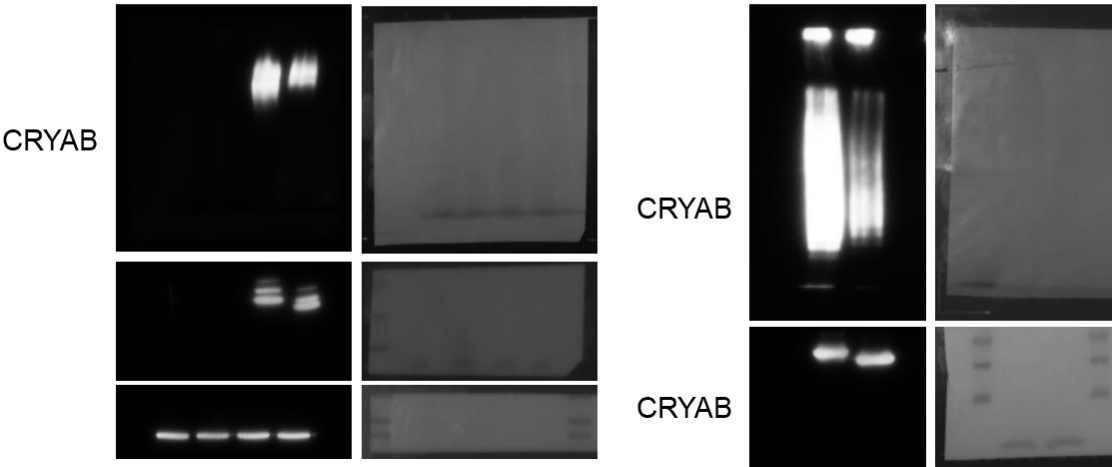

# Full unedited gel for Figure 2E

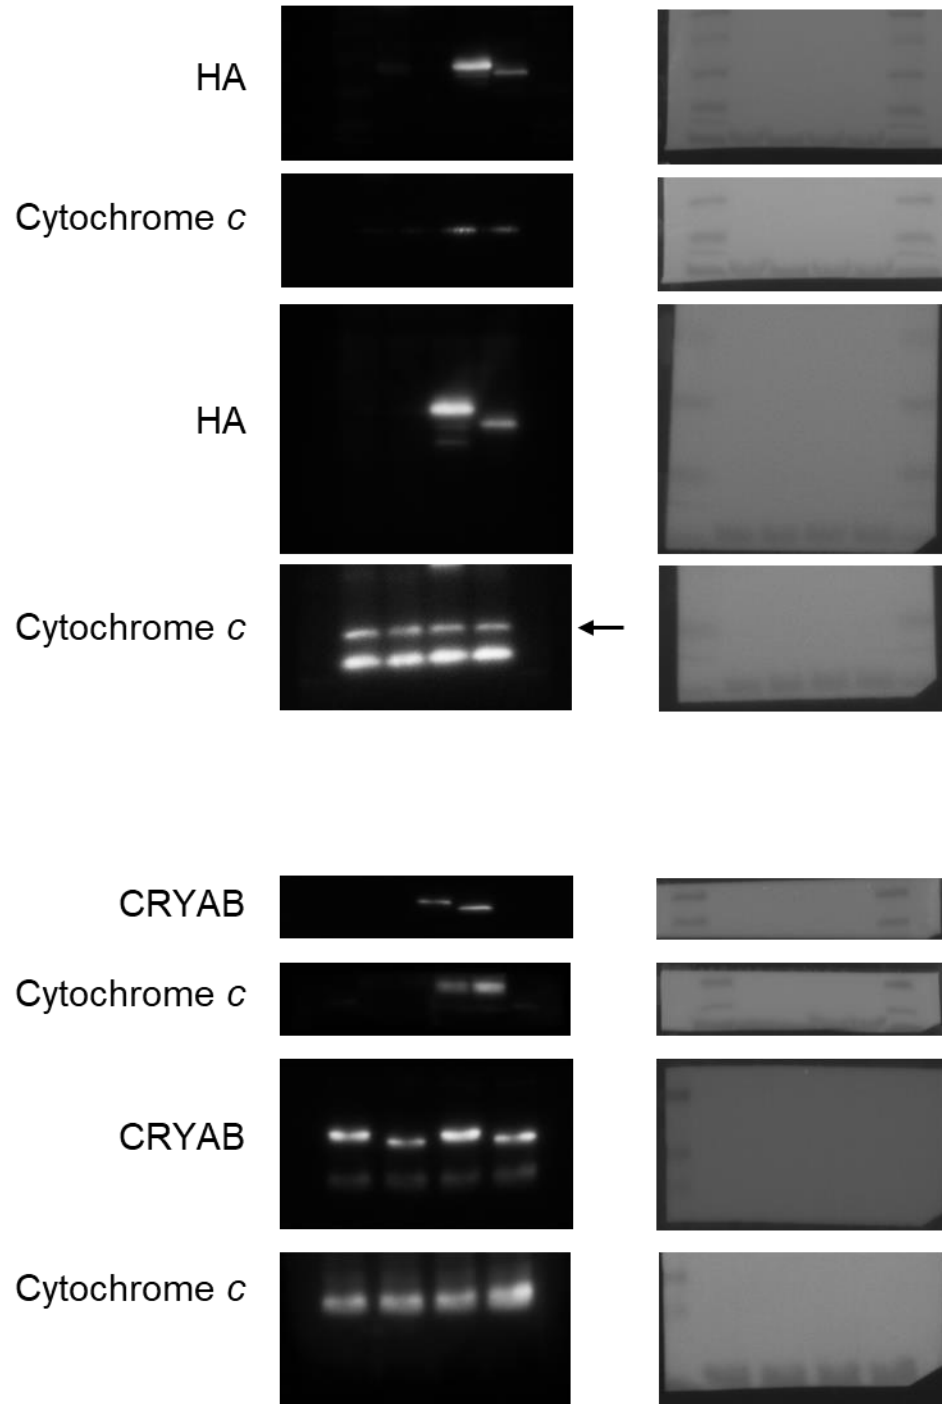

# Full unedited gel for Figure 3C

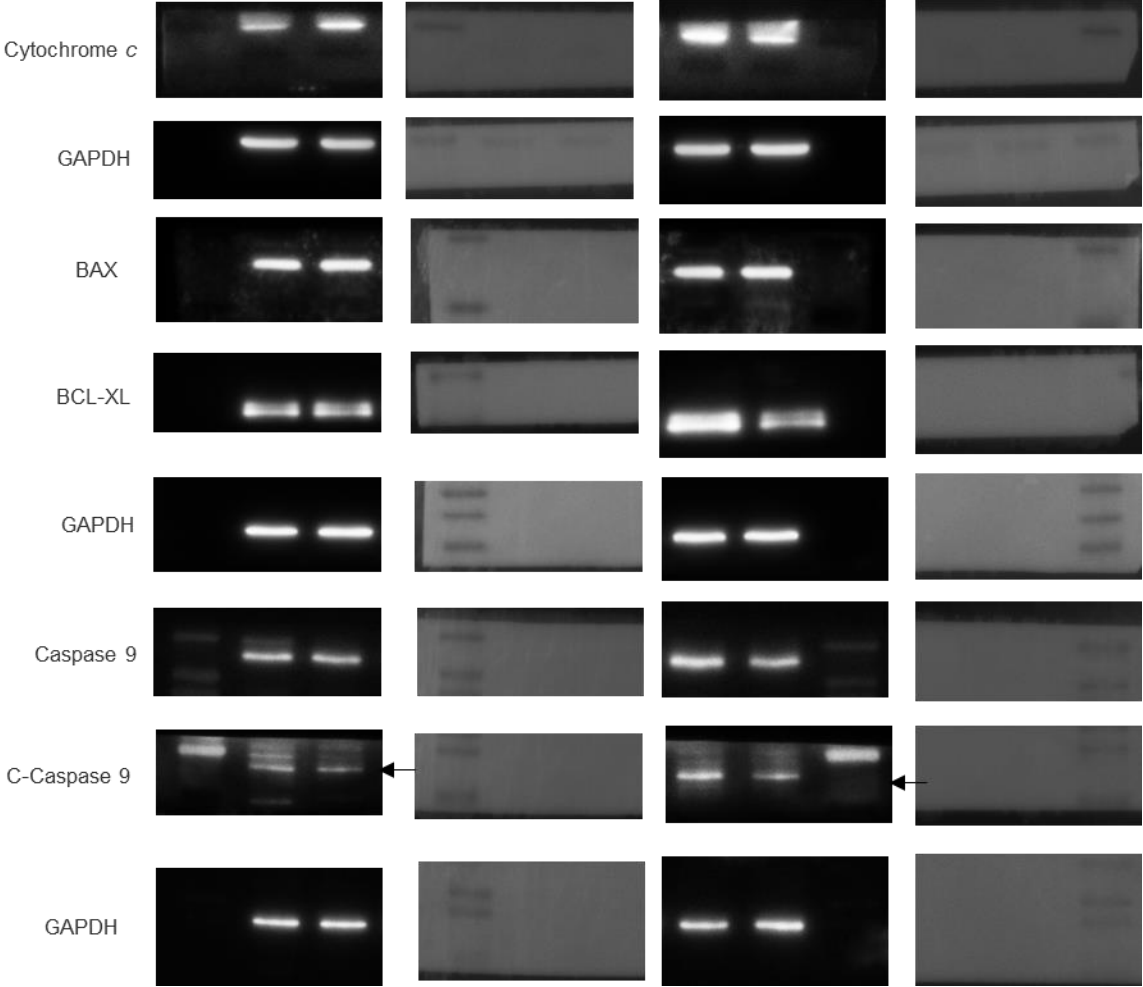

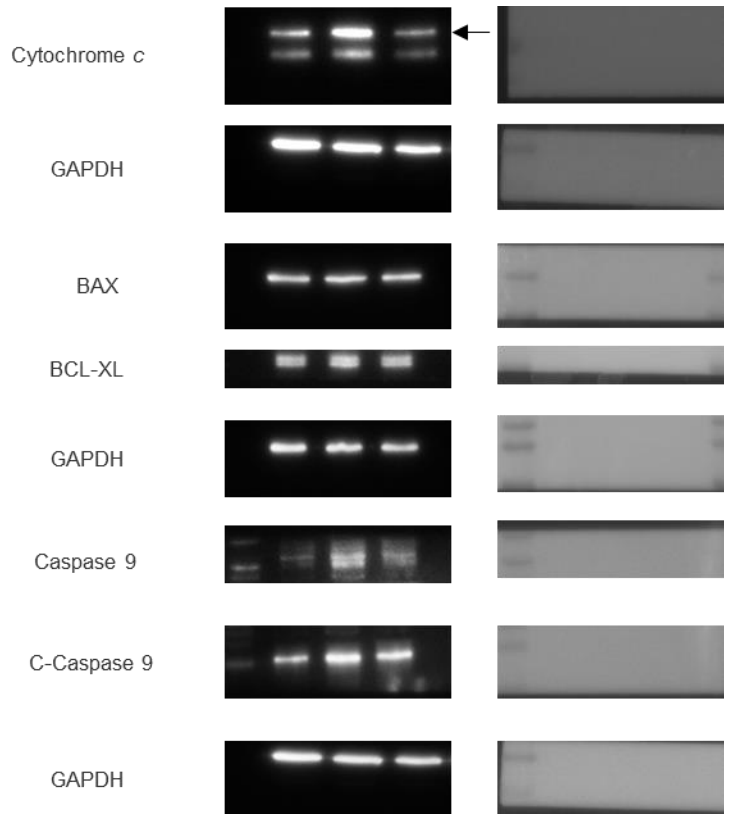

Full unedited gel for Figure 4A

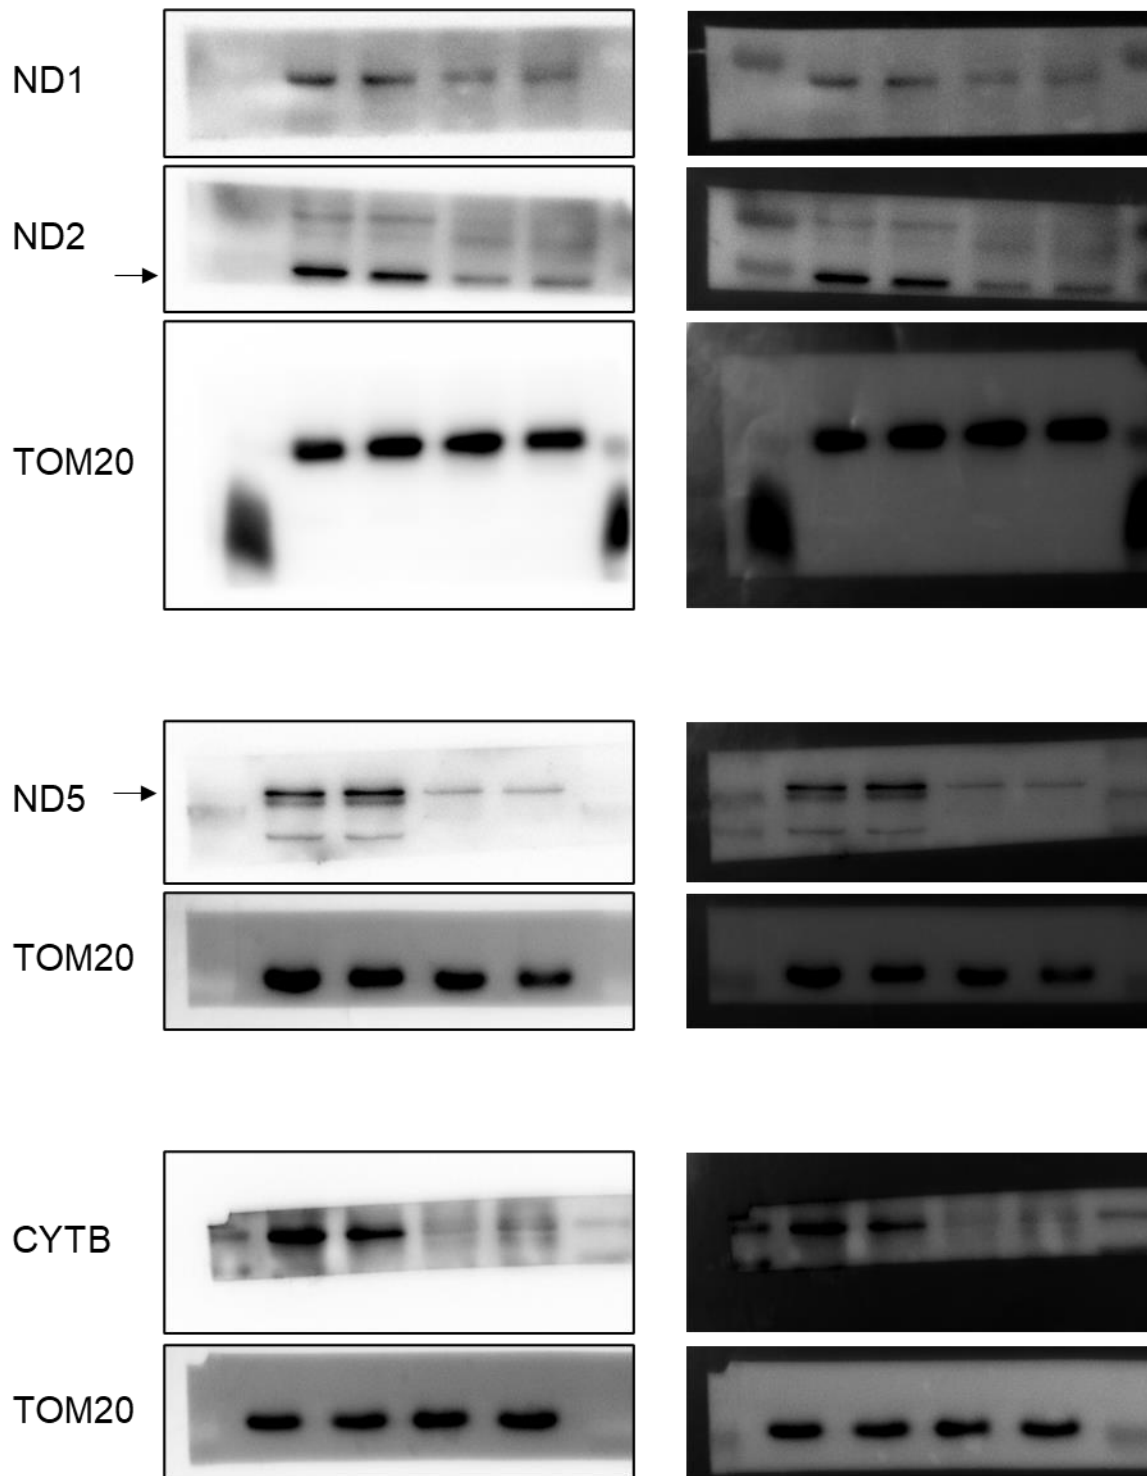

CO2

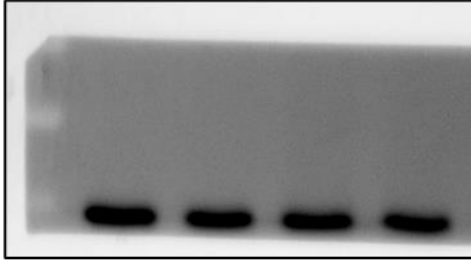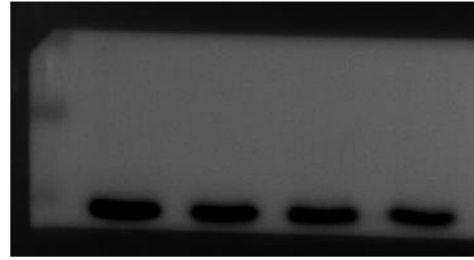

TOM20

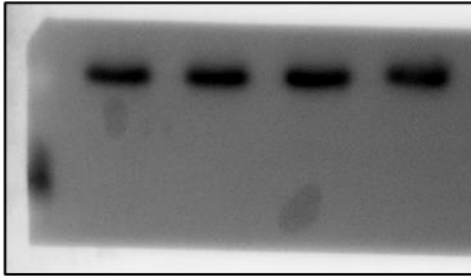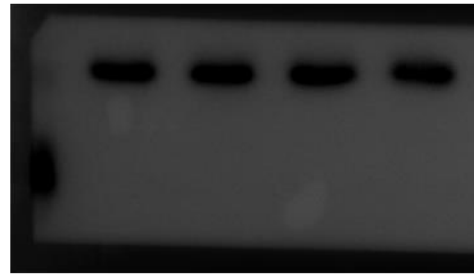

ATP8

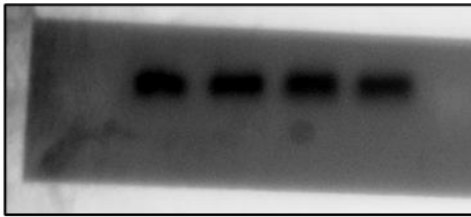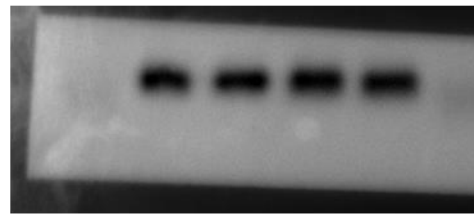

TOM20

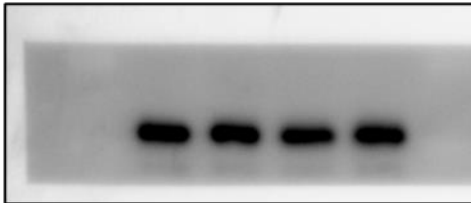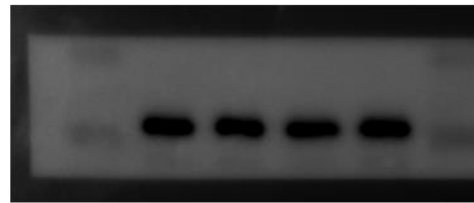

Full unedited gel for Figure 4B

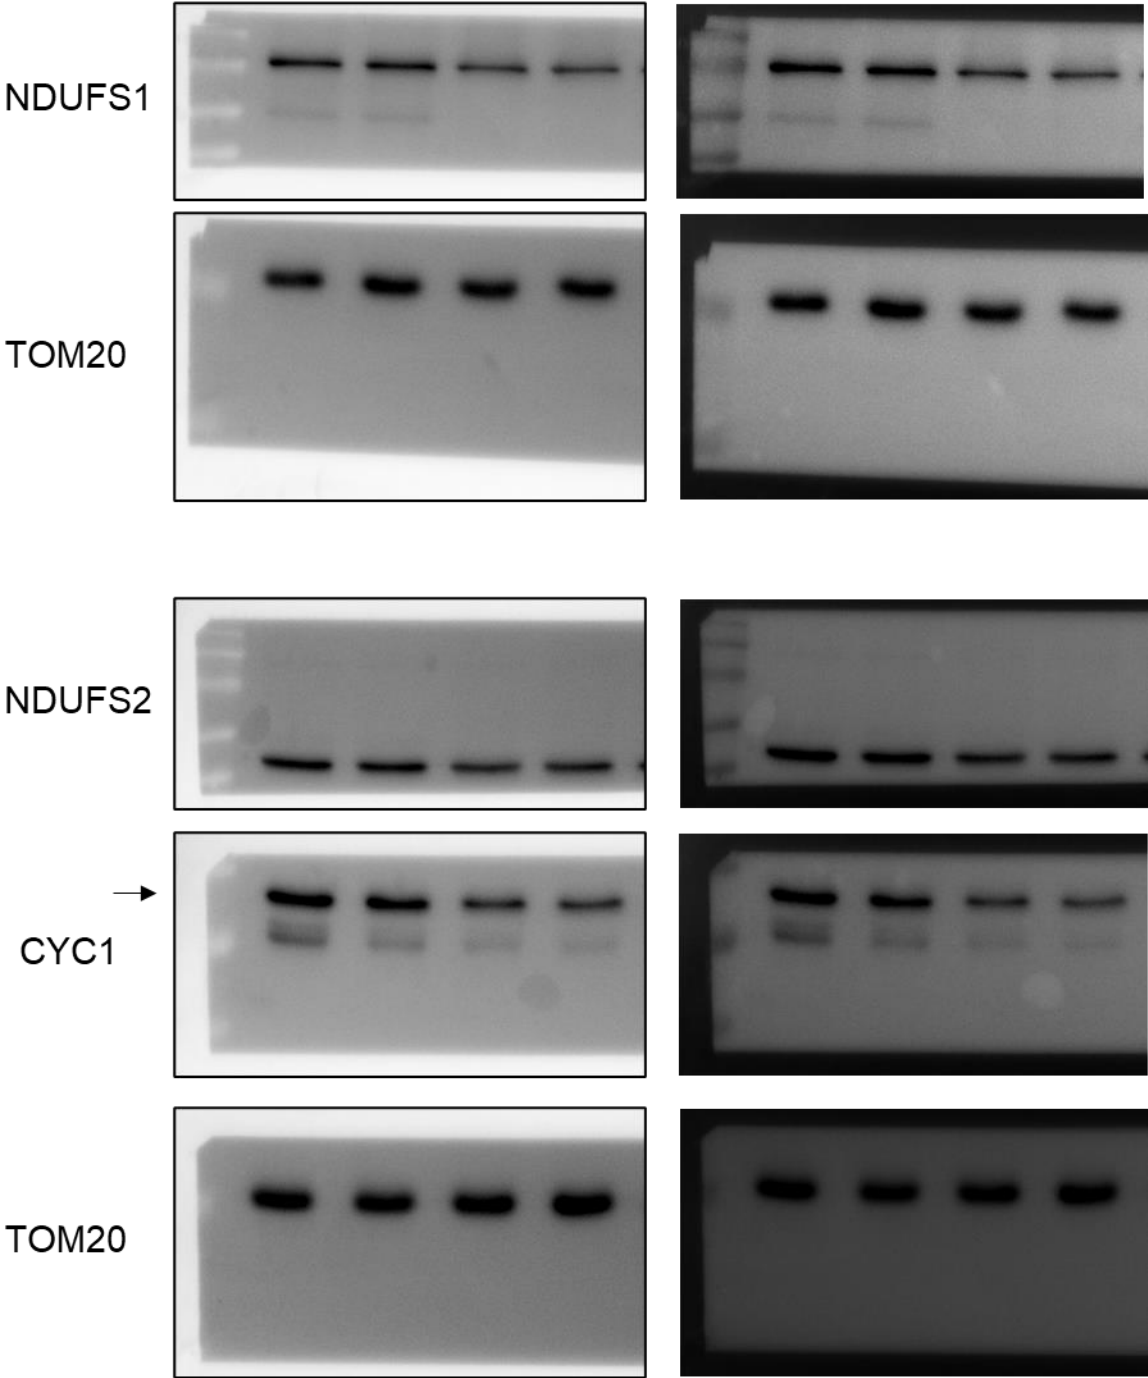



NDUFA10

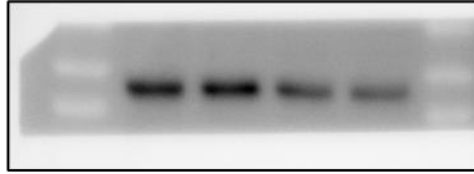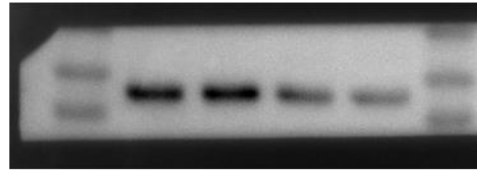

TOM20

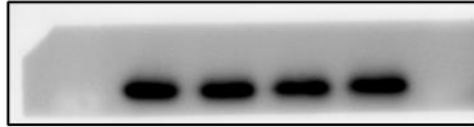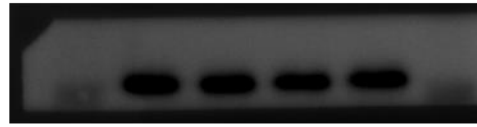

NDUFB8

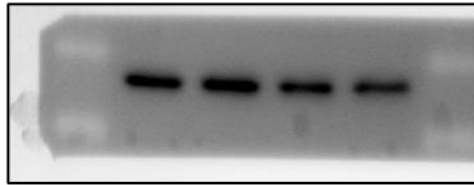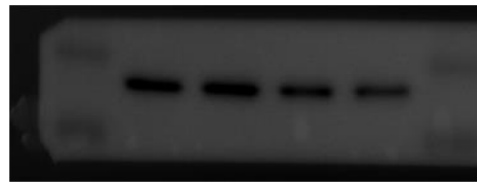

TOM20

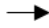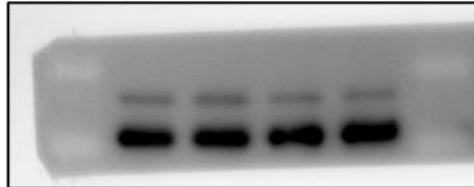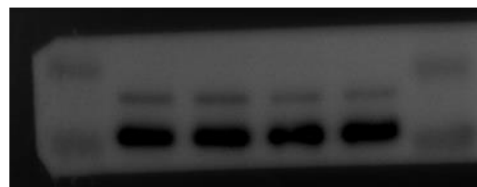

UQCRC2

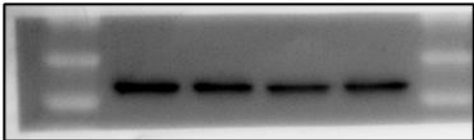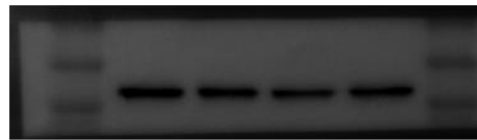

NDUFA8

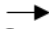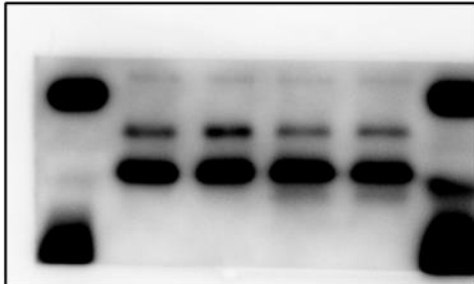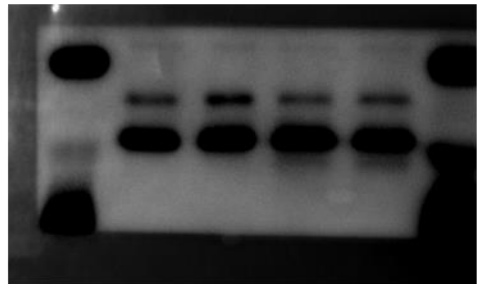

TOM20

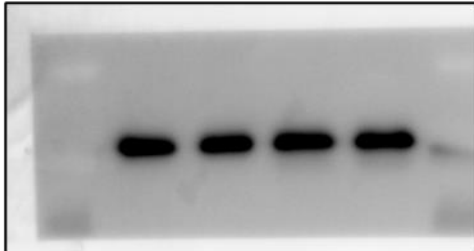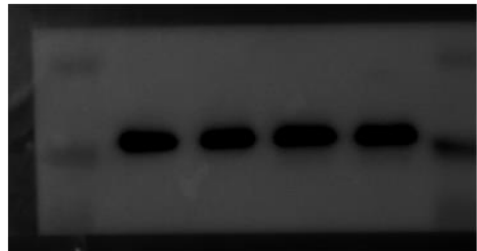

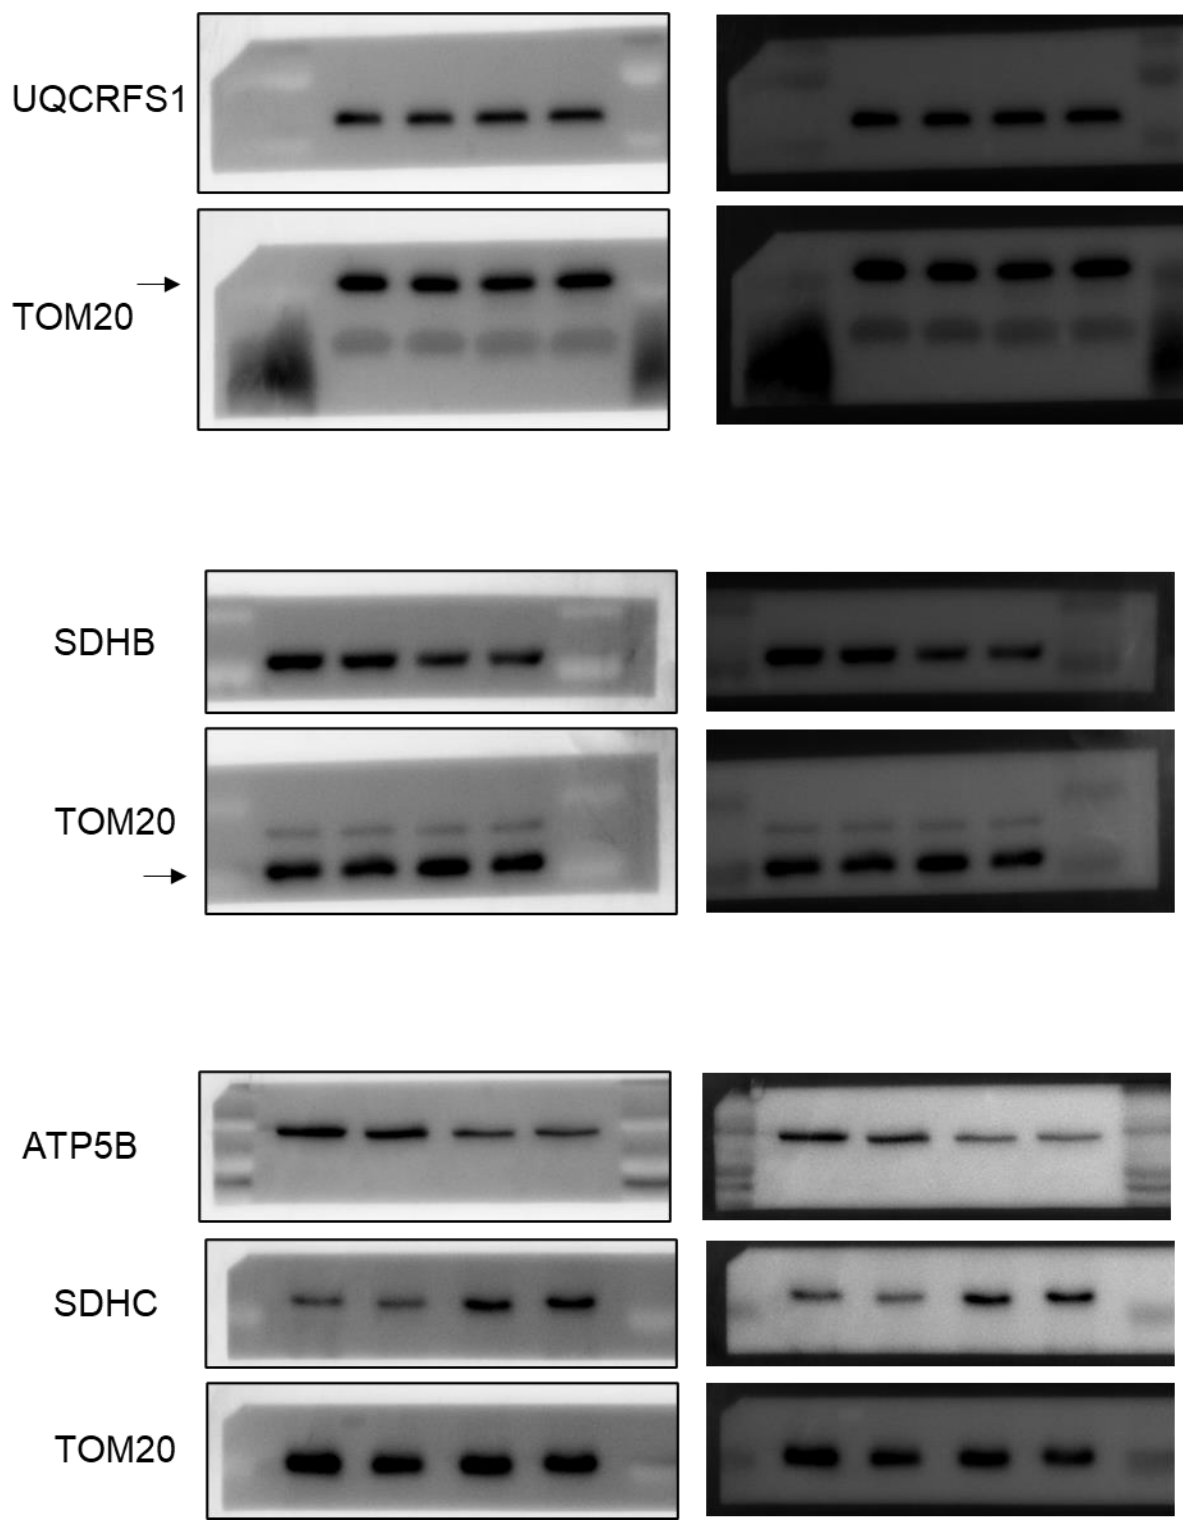

COX4

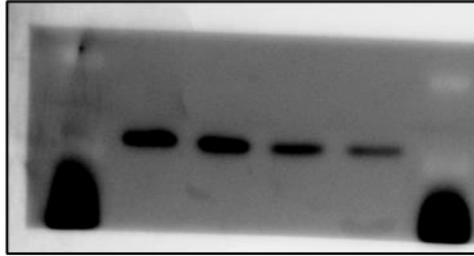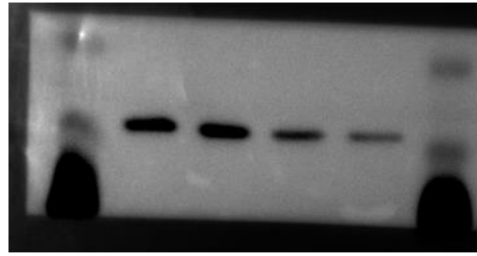

TOM20

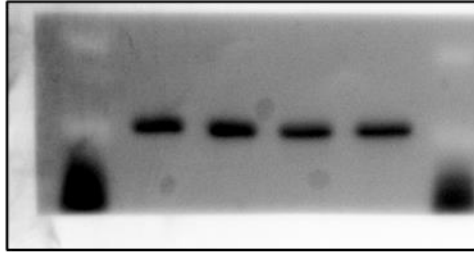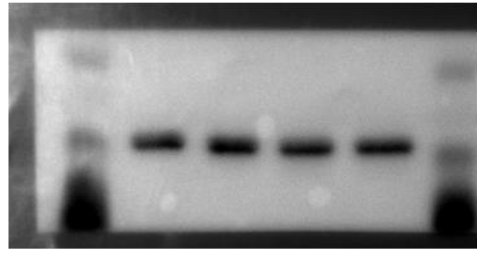

ATP5C

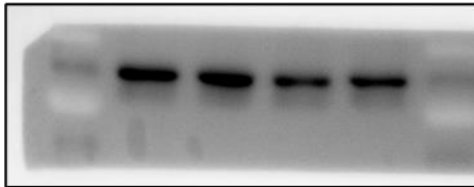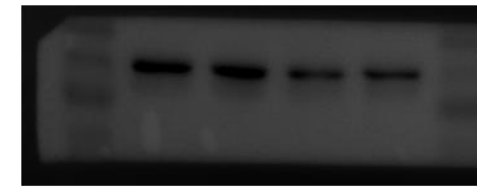

COX5A

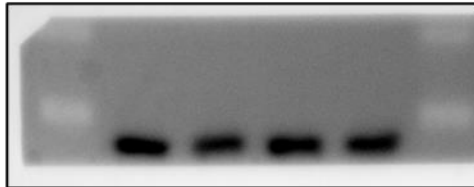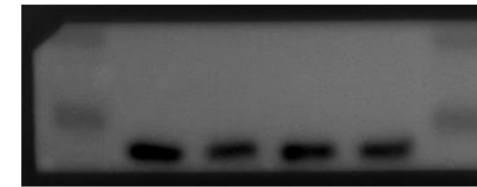

TOM20

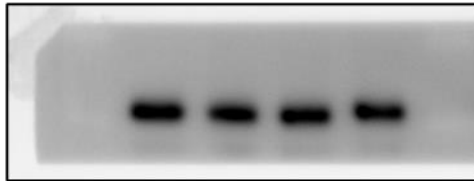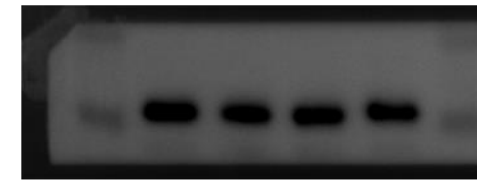

Full unedited gel for Figure 4D

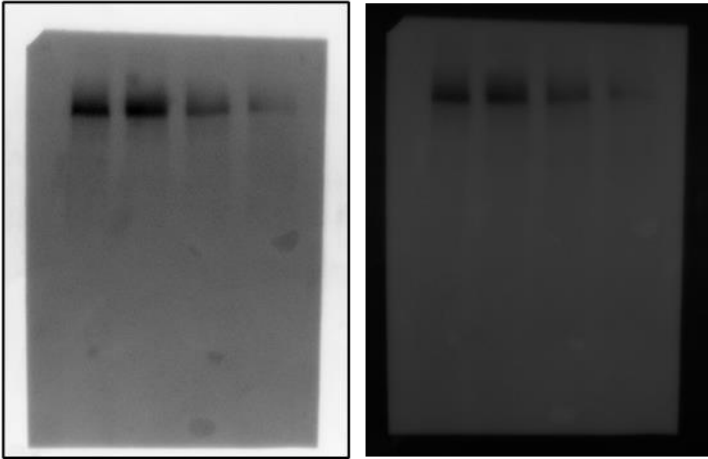

CI: NDUFS1

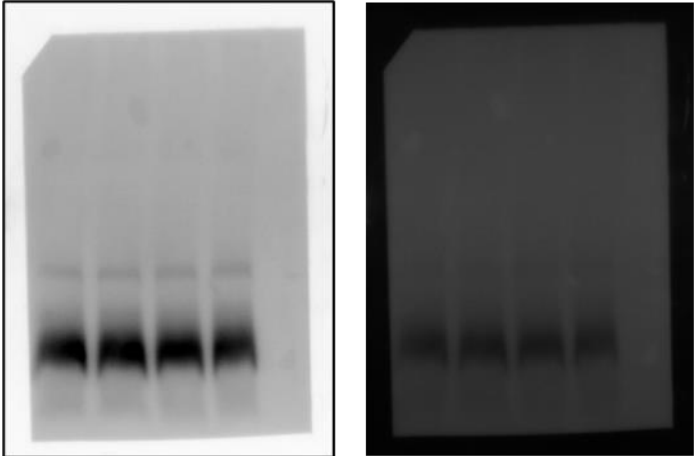

CII: SDHB

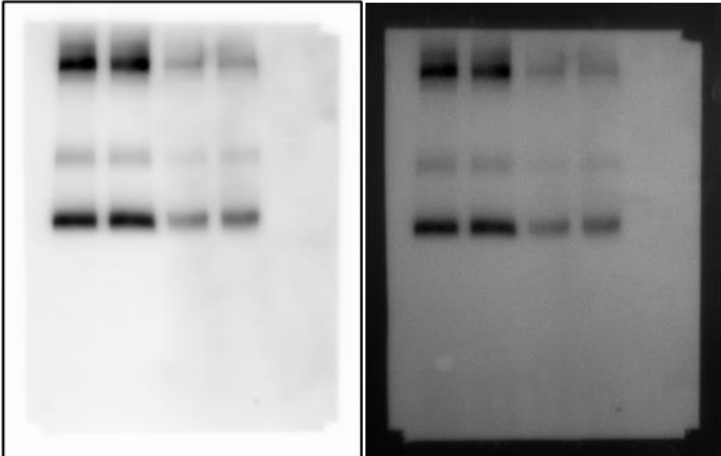

CIII: UQCRC2

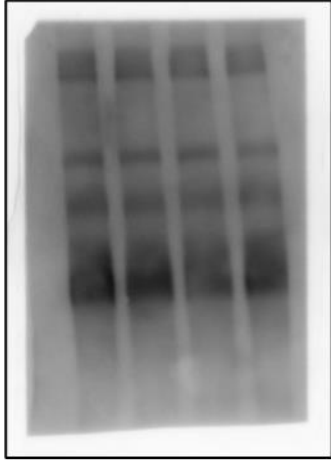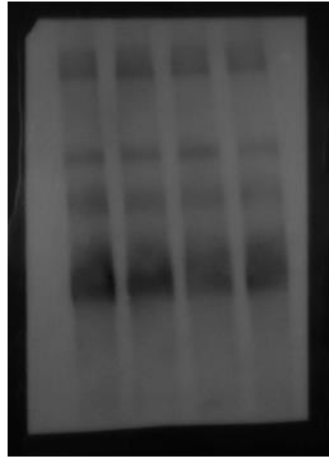

CIV: COX5A

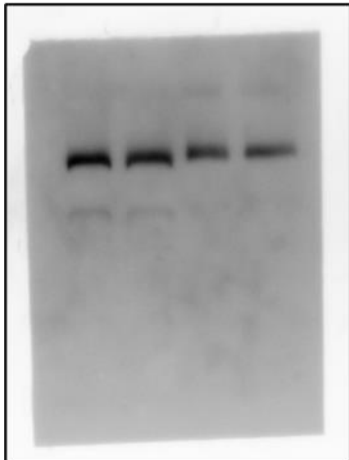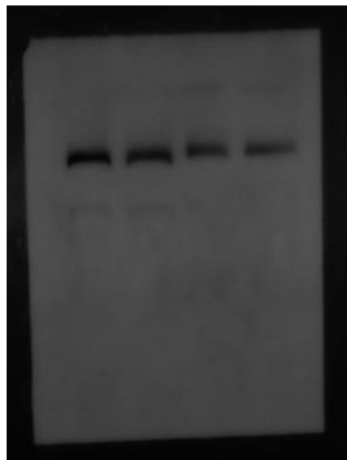

CV: ATP5A

Full unedited gel for Figure 5C

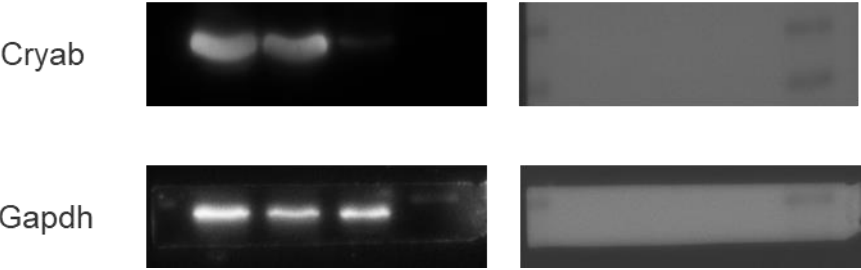

# Full unedited gel for Figure 6B

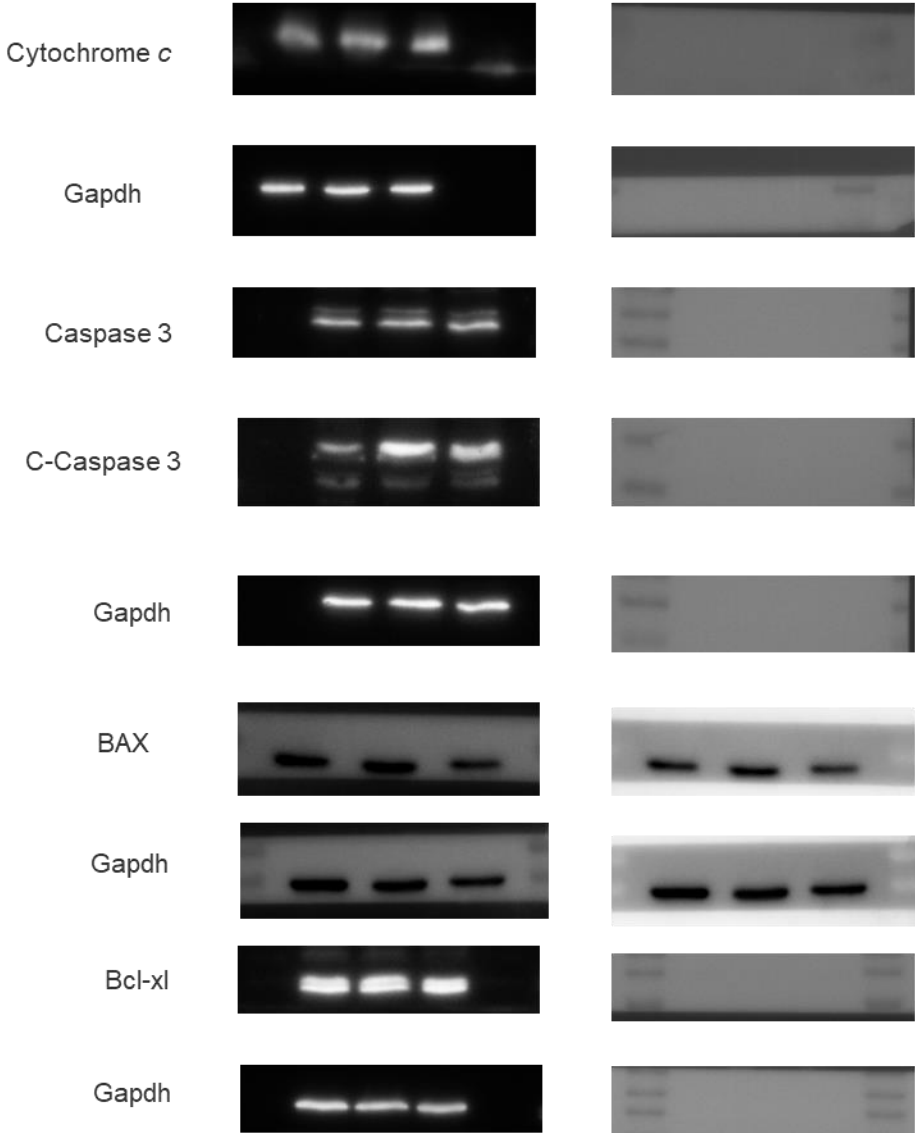

Full unedited gel for Figure 6C

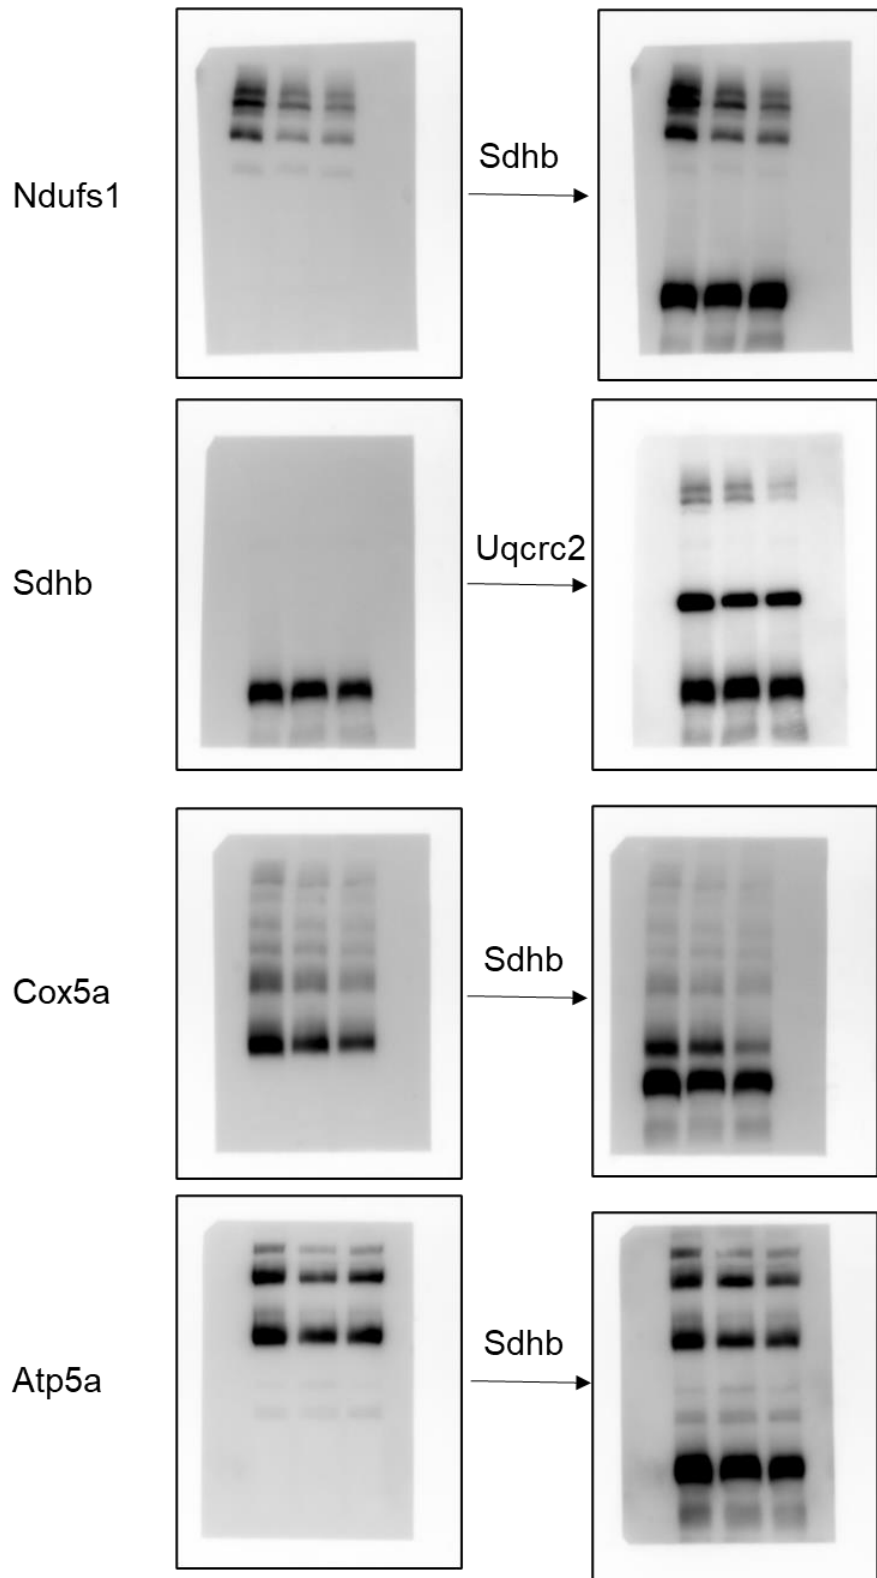



Full unedited gel for Figure 6E

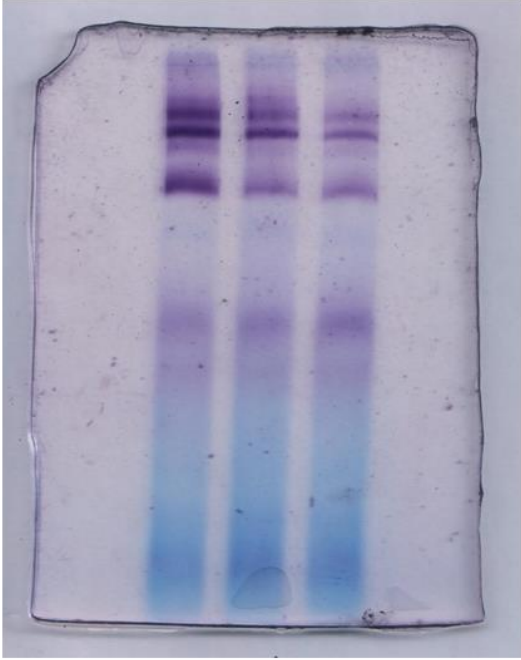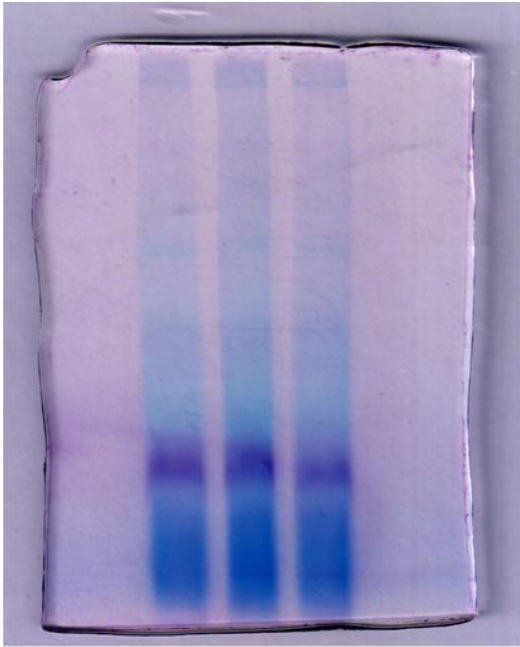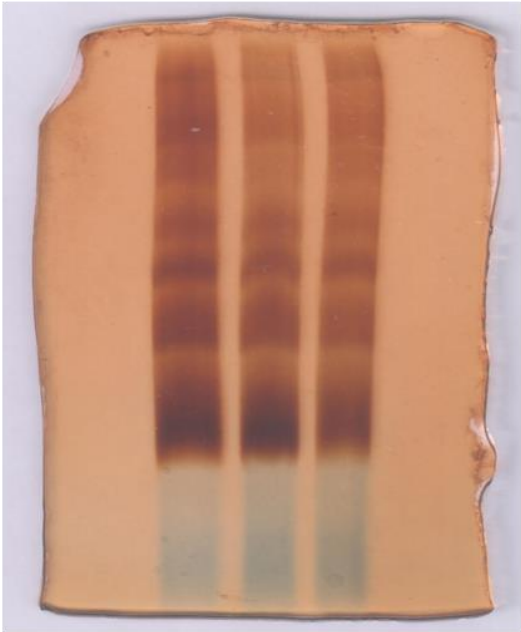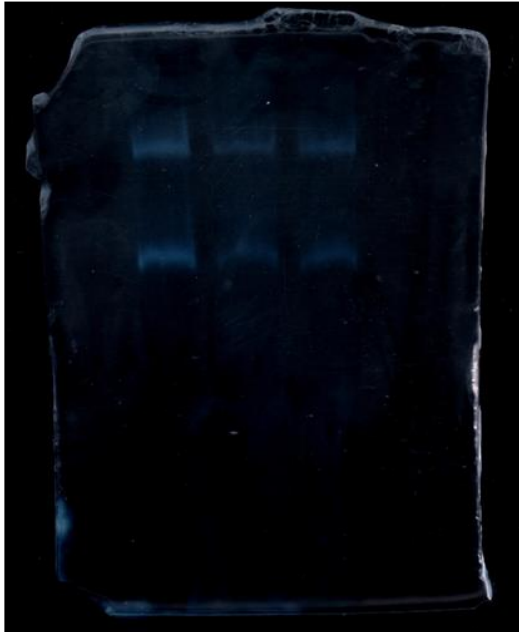

Full unedited gel for Figure S 4A

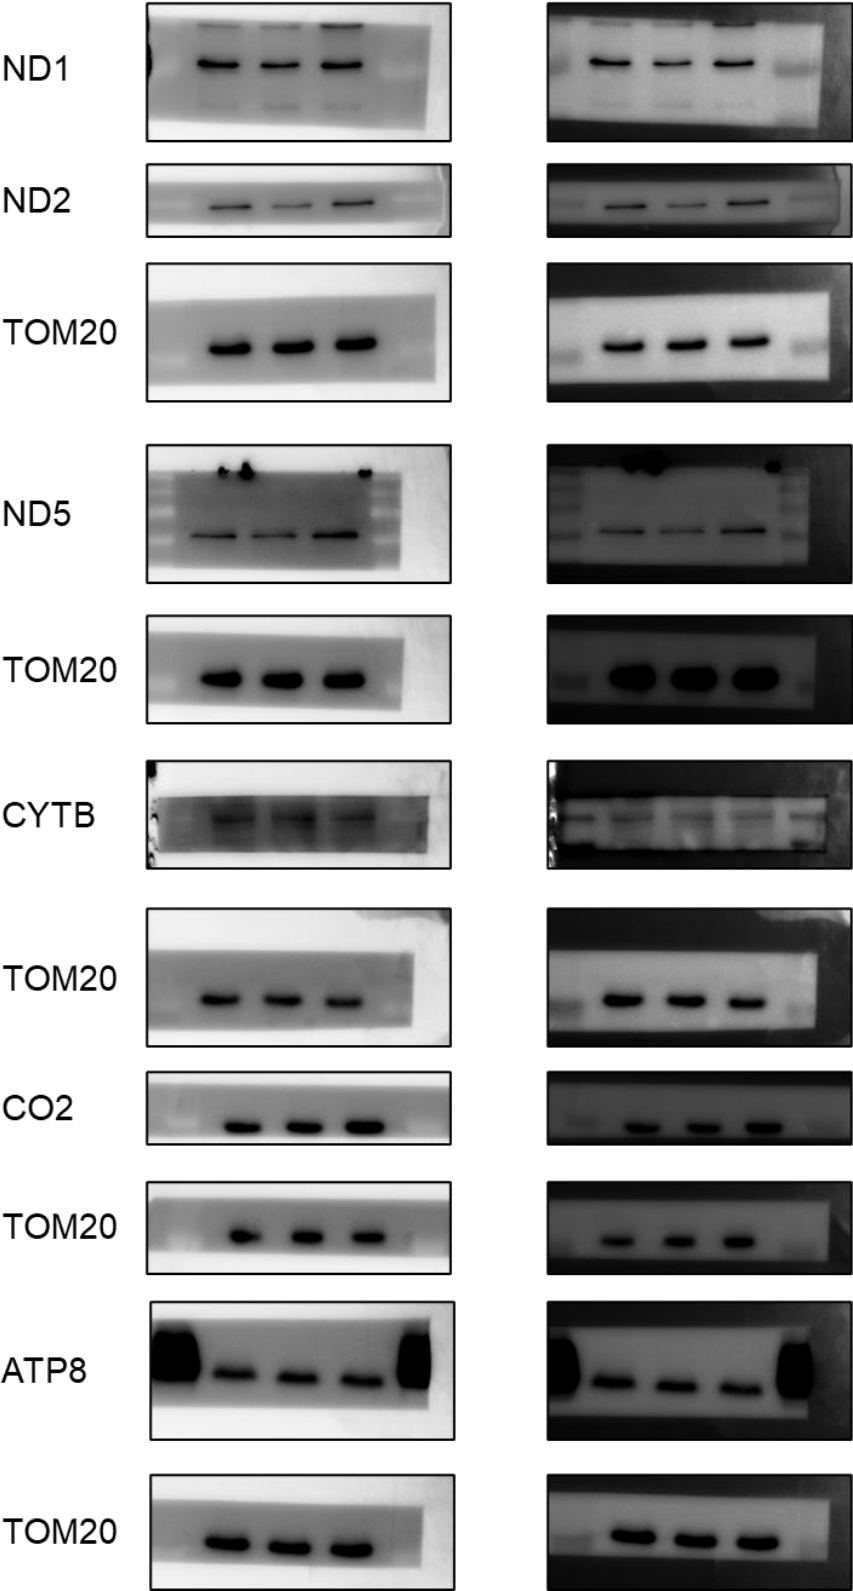

Full unedited gel for Figure S 4C

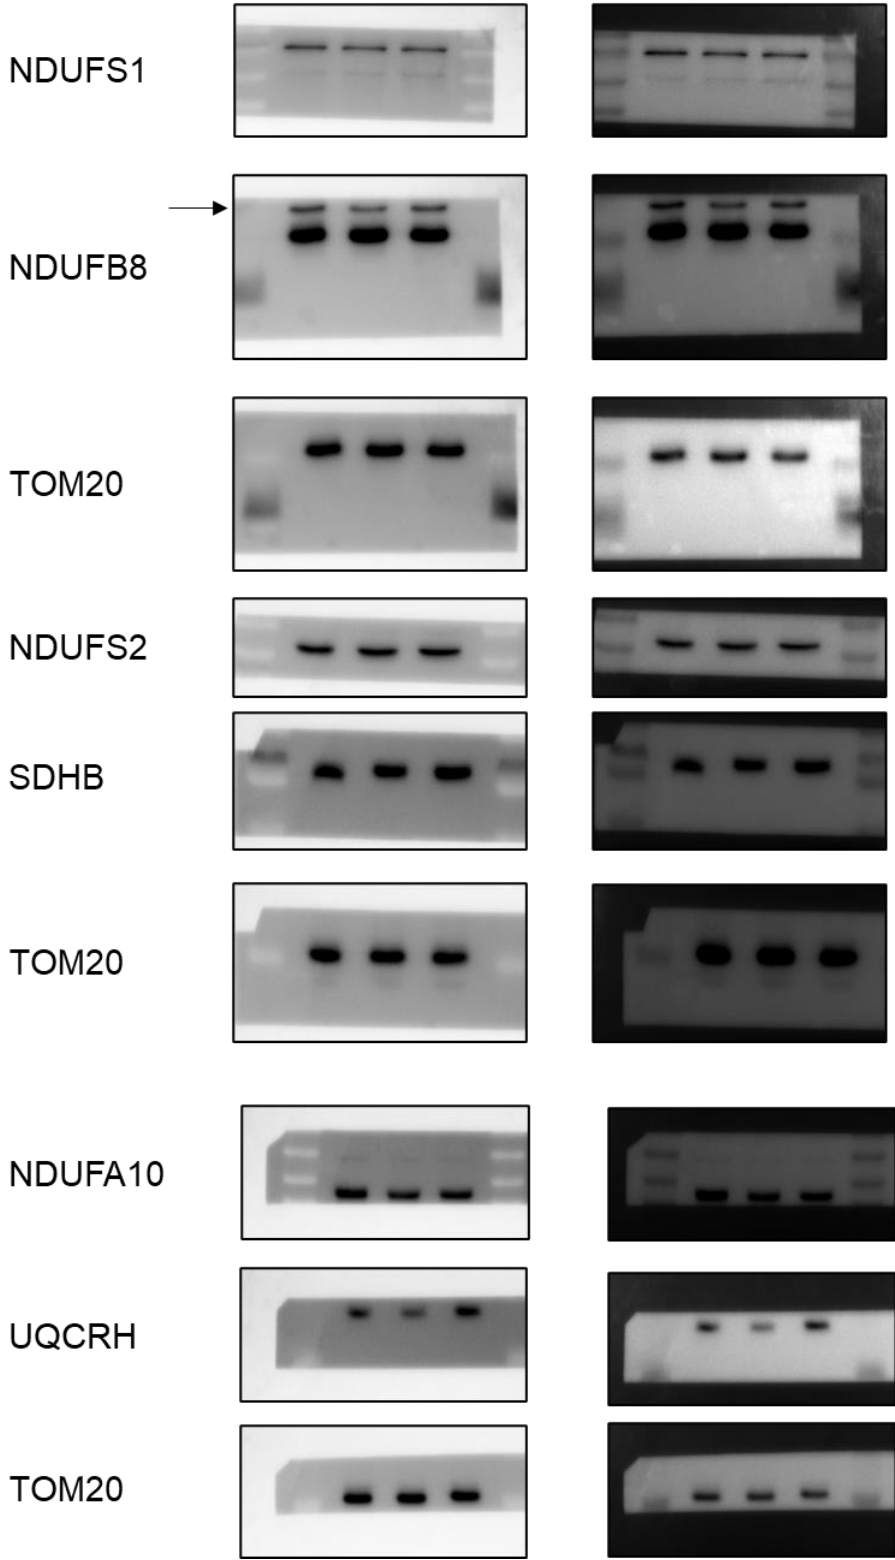

UQCRRS1

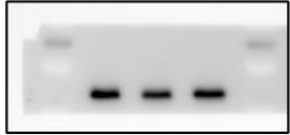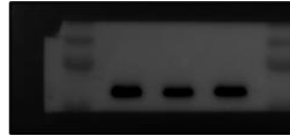

UQCRRQ

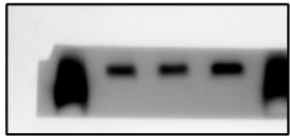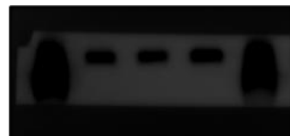

ATP5B

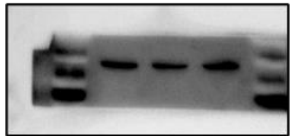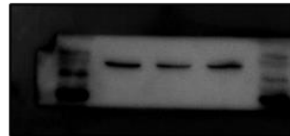

TOM20

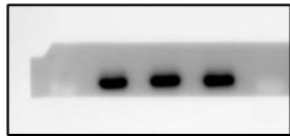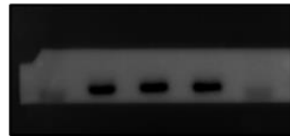

NDUFA8

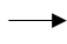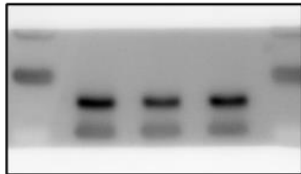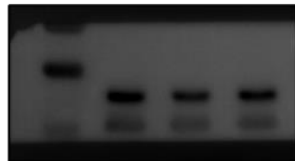

SDHC

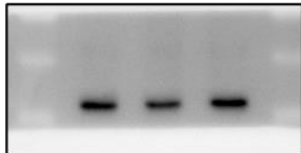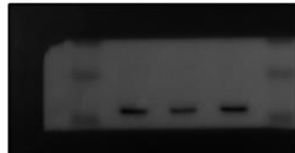

TOM20

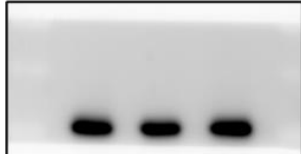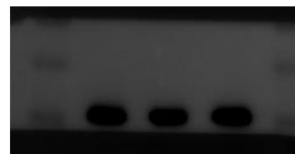

ATP5C

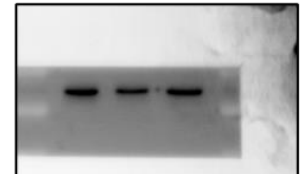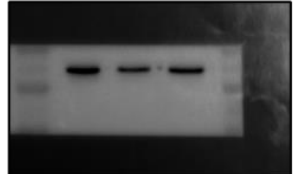

COX5A

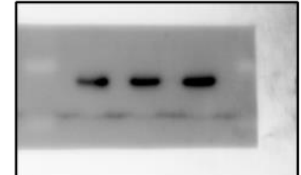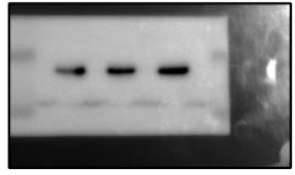

TOM20

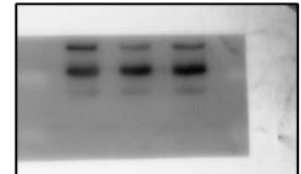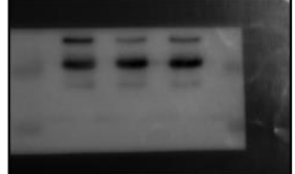

UQCRC2

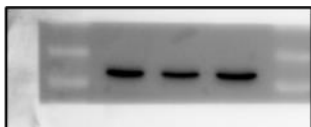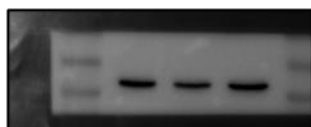

TOM20

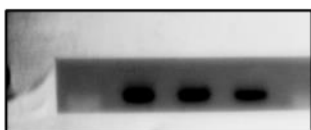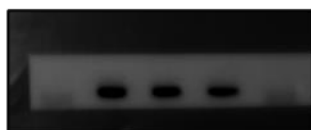

CYC1

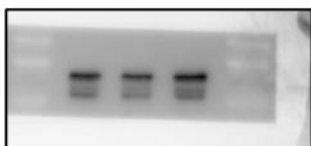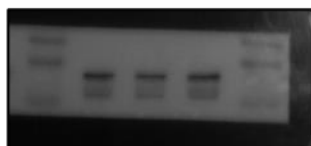

TOM20

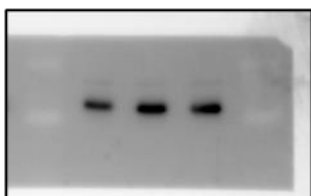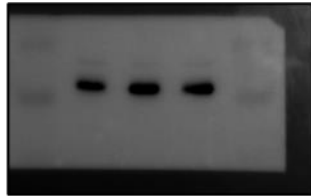

COX4

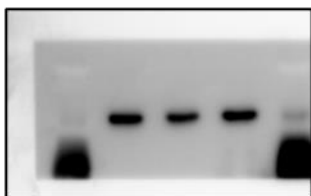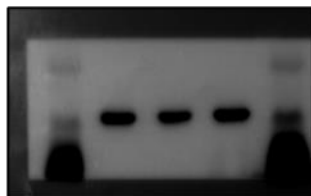

TOM20

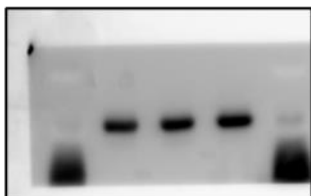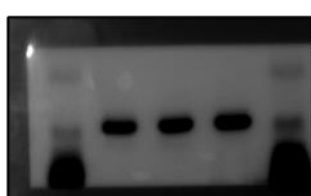

Full unedited gel for Figure S 5B

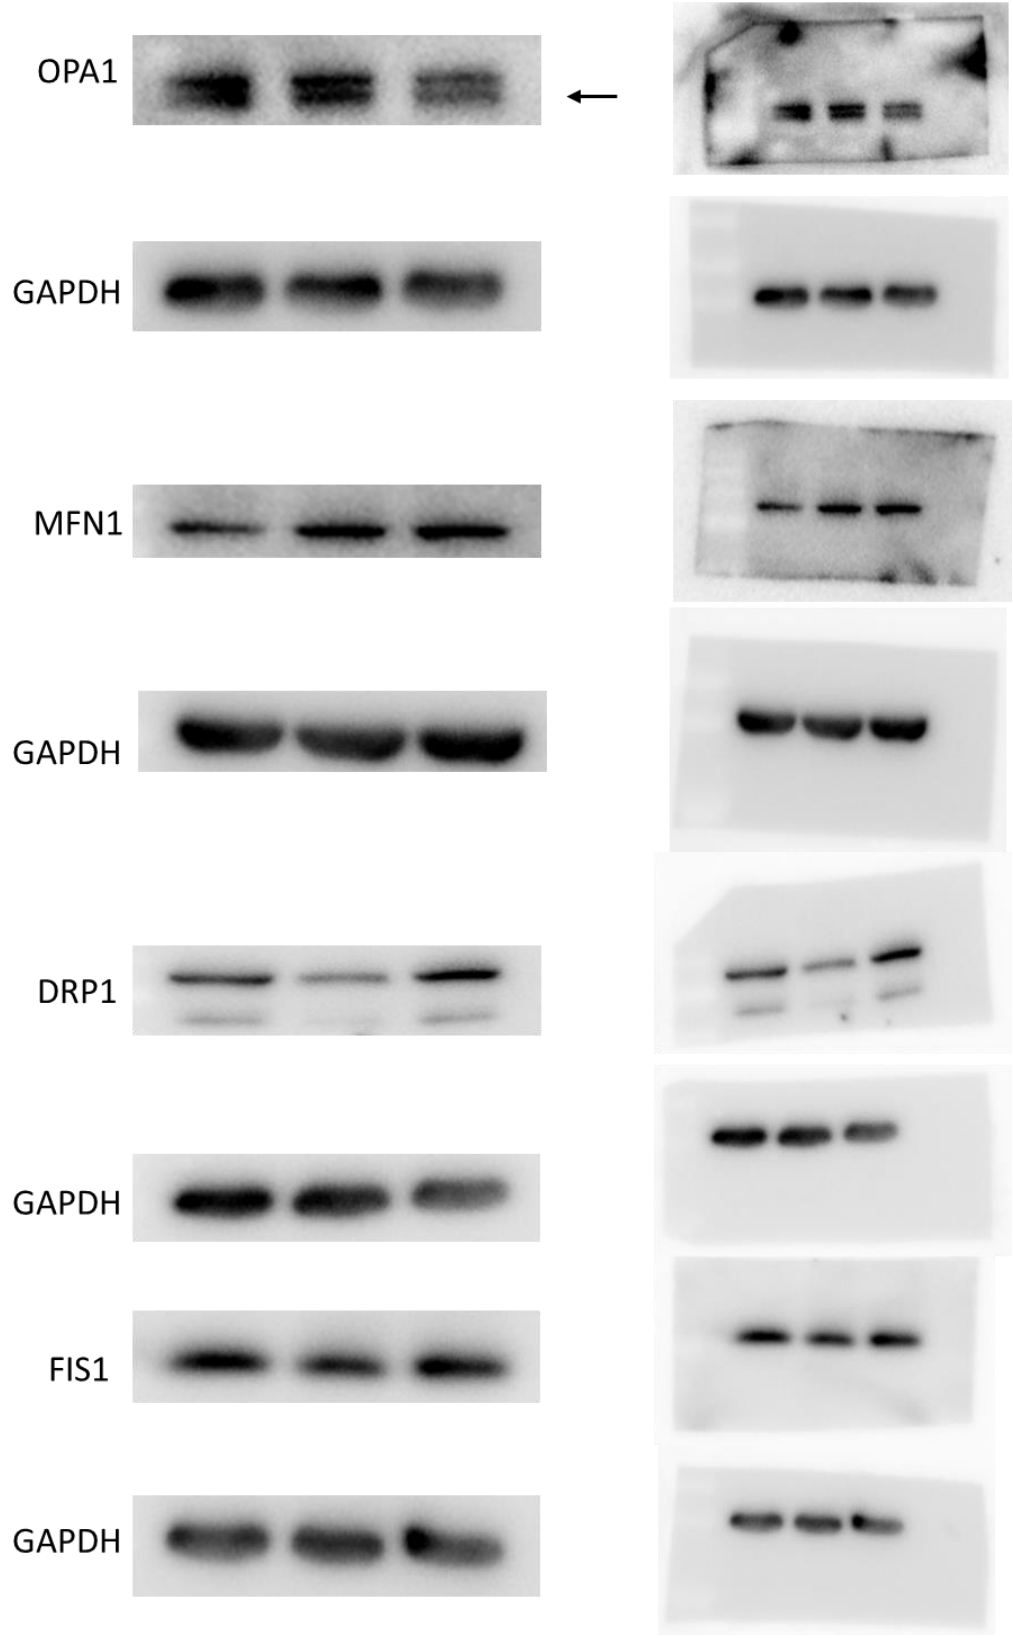

Supplement: jciinsight-10-182209-s281.pdf [file jciinsight-10-182209-s281.pdf]
