# Supplementary material for: Mutation of CRYAB encoding a conserved mitochondrial chaperone and antiapoptotic protein causes hereditary optic atrophy
Source: JCI Insight. 2024 Nov 19;10(1):e182209. doi: 10.1172/jci.insight.182209 (PMC11721302; doi:10.1172/jci.insight.182209)
Supplement: Supplemental data [file jciinsight-10-182209-s280.pdf]

*Supplementary data*

**Mutation of *CRYAB* encoding a conserved mitochondrial chaperone and anti-apoptotic protein causes hereditary optic atrophy**

Chenghui Wang<sup>1,2,3#</sup>, Liyao Zhang<sup>2#</sup>, Zhipeng Nie<sup>1,2,3#</sup>, Min Liang<sup>4</sup>, Hanqing Liu<sup>2</sup>, Qiuzi Yi<sup>2</sup>, Chunyan Wang<sup>2</sup>, Cheng Ai<sup>1,2,3</sup>, Juanjuan Zhang<sup>4</sup>, Yinglong Gao<sup>2,5</sup>, Yanchun Ji<sup>2,5</sup>, and Min-Xin Guan<sup>1,2,3,6\*</sup>

The supplemental data included the following information:

1. Supplemental Figure 1, 2, 3, 4, 5, 6, and 7
2. Supplemental Table 1, 2, 3, 4 and 5

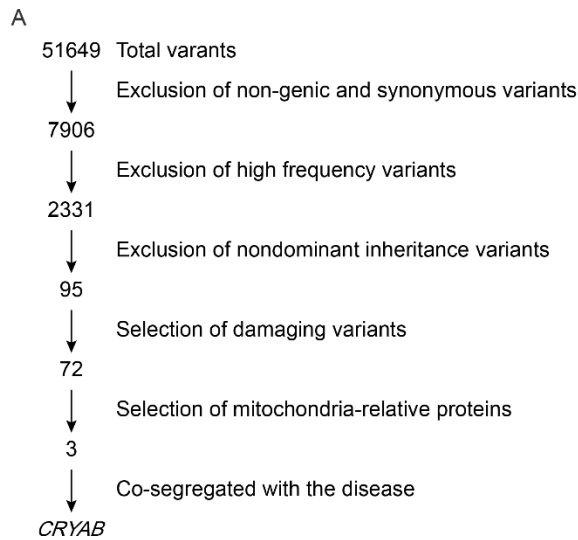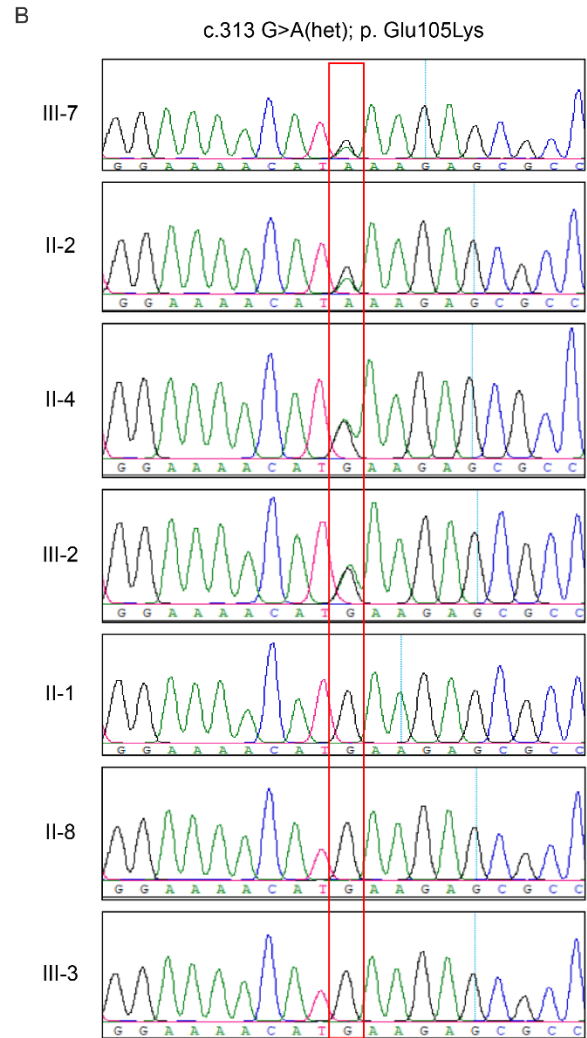

**Supplemental Figure 1 (related to Figure 1). Identification of c.313G>A (p.Glu105Lys) mutation in *CRYAB* gene.** Summary of whole exome sequencing of the proband (WZ1303-III-7). The identified single nucleotide variant (SNV) c.313G>A (p.Glu105Lys) is located in *CRYAB*, a gene encoding a major lens protein belonging to the small heat-shock family of proteins and possessing anti-apoptotic activities. **(B)** Partial sequence chromatograms of *CRYAB* gene. Sanger sequencing of affected individuals III-7, II-2, II-4, III-2 and unaffected individuals II-1, II-8, III-3 of the WZ1303 family. The red frame indicates the location of the nucleotide changes at position 313.

|                           |                                                       |     |
|---------------------------|-------------------------------------------------------|-----|
| <i>Homo_sapiens</i>       | MDIAIHHPWIRRPFFPFHSPSRLLFDQFFGEHLLESLLFPTSTSLSPFYLR   | 50  |
| <i>Macaca_mulatta</i>     | MDIAIHHPWIRRPFFPFHSPSRLLFDQFFGEHLLESLLFPTSTSLSPFYLR   | 50  |
| <i>Mus_musculus</i>       | MDIAIHHPWIRRPFFPFHSPSRLLFDQFFGEHLLESLLFSTATSLSPFYLR   | 50  |
| <i>Equus_caballus</i>     | MDIAIHHPWIRRPFFPFHSPSRLLFDQFFGEHLLESLLFPTSTSLSPFYLR   | 50  |
| <i>Ovis_aries</i>         | MDIAIHHPWIRRPFFPFHSPSRLLFDQFFGEHLLESLLFFASTSLSPFYLR   | 50  |
| <i>Gallus_gallus</i>      | MDITIHNELIRRPPLFSWLTFSRIIFDQIFGEHLQESSELLPTSPSLSPFLMR | 50  |
| <i>Chelonia_mydas</i>     | MDIAIHHELIRRPPLFSFLTETRIIFDQSFGEHLSESELFPSTGALSPFLIR  | 50  |
| <i>Xenopus_tropicalis</i> | MDVAIQHEWERRHFYSEFGENRIIFDQNFGEHLHEAELFPTS.SVSPFFER   | 49  |
|                           | mdiaihhpwirrpffpfhspsrllfdqffgehllesdlfptstslspfylyr  |     |
| <i>Homo_sapiens</i>       | FFSFIRAPSWIDTGLSEMRLEKDRFSVNLVDKHFSPPEELKVKVLGDVIEV   | 100 |
| <i>Macaca_mulatta</i>     | FFSFIRAPSWIDTGLSEMRLEKDRFSVNLVDKHFSPPEELKVKVLGDVIEV   | 100 |
| <i>Mus_musculus</i>       | FFSFIRAPSWIDTGLSEMRLEKDRFSVNLVDKHFSPPEELKVKVLGDVIEV   | 100 |
| <i>Equus_caballus</i>     | FFSFIRAPSWIDTGLSEMRLEKDRFSVNLVDKHFSPPEELKVKVLGDVIEV   | 100 |
| <i>Ovis_aries</i>         | FFSFIRAPSWIDTGLSEVRLEKDRFSVNLVDKHFSPPEELKVKVLGDVIEV   | 100 |
| <i>Gallus_gallus</i>      | SE.FFERPFWLETGLSEMRLEKDKFSVNLVDKHFSPPEELKVKVLGDVIEI   | 99  |
| <i>Chelonia_mydas</i>     | SE.FLRTPSWLETGLSEMRLEKDKFSVNLVDKHFSPPEELKVKVLGDVIEV   | 99  |
| <i>Xenopus_tropicalis</i> | YE.FSRLENWIDSGLSEMKIDKDRFSVNLVDKHFSPPEELNKKVLGDVIEI   | 98  |
|                           | ppsflrapswidtglssemrlekdrfsvnldvkhfspeelkvkvlgdviev   |     |
|                           | ↓ Glu 105 Lys                                         |     |
| <i>Homo_sapiens</i>       | HGKHEERQDEHGFISREFHRKYRIPADVDFLTITSSLSSDGVLTVNGPRK    | 150 |
| <i>Macaca_mulatta</i>     | HGKHEERQDEHGFISREFHRKYRVPADVDFLTITSSLSSDGVLTVNGPRK    | 150 |
| <i>Mus_musculus</i>       | HGKHEERQDEHGFISREFHRKYRIPADVDFLTITSSLSSDGVLTVNGPRK    | 150 |
| <i>Equus_caballus</i>     | HGKHEERQDEHGFISREFHRKYRIPADVDFLAITSSLSSDGVLTVNGPRK    | 150 |
| <i>Ovis_aries</i>         | HGKHEERQDEHGFISREFHRKYRIPADVDFLTITSSLSSDGVLTVMNGPRK   | 150 |
| <i>Gallus_gallus</i>      | HGKHEERQDEHGFIAREFSRKYRIPADVDFLTITSSLSDGVLTVSAPRK     | 149 |
| <i>Chelonia_mydas</i>     | HGKHEERQDEHGFIAREFNRKYRIPADVDFLSITSSLSSDGVLTVNGPRK    | 149 |
| <i>Xenopus_tropicalis</i> | HGTHEERQDEHGYVSRDFCRFYKIPSDVDVQSITSTLSFDGVLTVSGPRK    | 148 |
|                           | hgkheerqdehgfisrefhrkyripadvdpltitsslssdgvltvngprk    |     |
| <i>Homo_sapiens</i>       | QVSGPERTIPITREEKPAVTAAPKK.....                        | 175 |
| <i>Macaca_mulatta</i>     | QVSGPERTIPITREEKPAVTAAPKK.....                        | 175 |
| <i>Mus_musculus</i>       | QVSGPERTIPITREEKPAVAAAPKK.....                        | 175 |
| <i>Equus_caballus</i>     | QASGPERTIPITREEKPAVTAPKK.....                         | 174 |
| <i>Ovis_aries</i>         | QASGPERTIPITREEKPAVTAAPKK.....                        | 175 |
| <i>Gallus_gallus</i>      | QSDVPERSIPITREEKPAIAGSQRK.....                        | 174 |
| <i>Chelonia_mydas</i>     | QTDVPERTIPITREEKPAIAGAQRK.....                        | 174 |
| <i>Xenopus_tropicalis</i> | VSEVPERCIPIITREEKVAISSTLKK.....                       | 173 |
|                           | q sgpertipitreekpavtaapkk                             |     |

**Supplemental Figure 2 (related to Figure 1).** Alignments of the amino acid sequences of CRYAB family among different species. The alignment was generated using the DNAMAN software. The organisms and corresponding accession numbers used for this analysis are as follows: *Homo sapiens* (NP\_001276737.1), *Macaca mulatta* (XP\_028688504.1), *Mus musculus* (CAJ18549.1), *Equus caballus* (XP\_001501829.1), *Ovis aries* (NP\_001012475.1), *Gallus gallus* (NP\_990507.2), *Chelonia mydas* (XP\_007072715.3) and *Xenopus tropicalis* (XP\_002932964.1). Numbers give the position of residues in proteins in relation to the first methionine of the *Homo sapiens*. Amino acid residues shaded black are identical; those shaded pink and faint blue are similar in at least six residues and four residues of eight homologs, respectively.

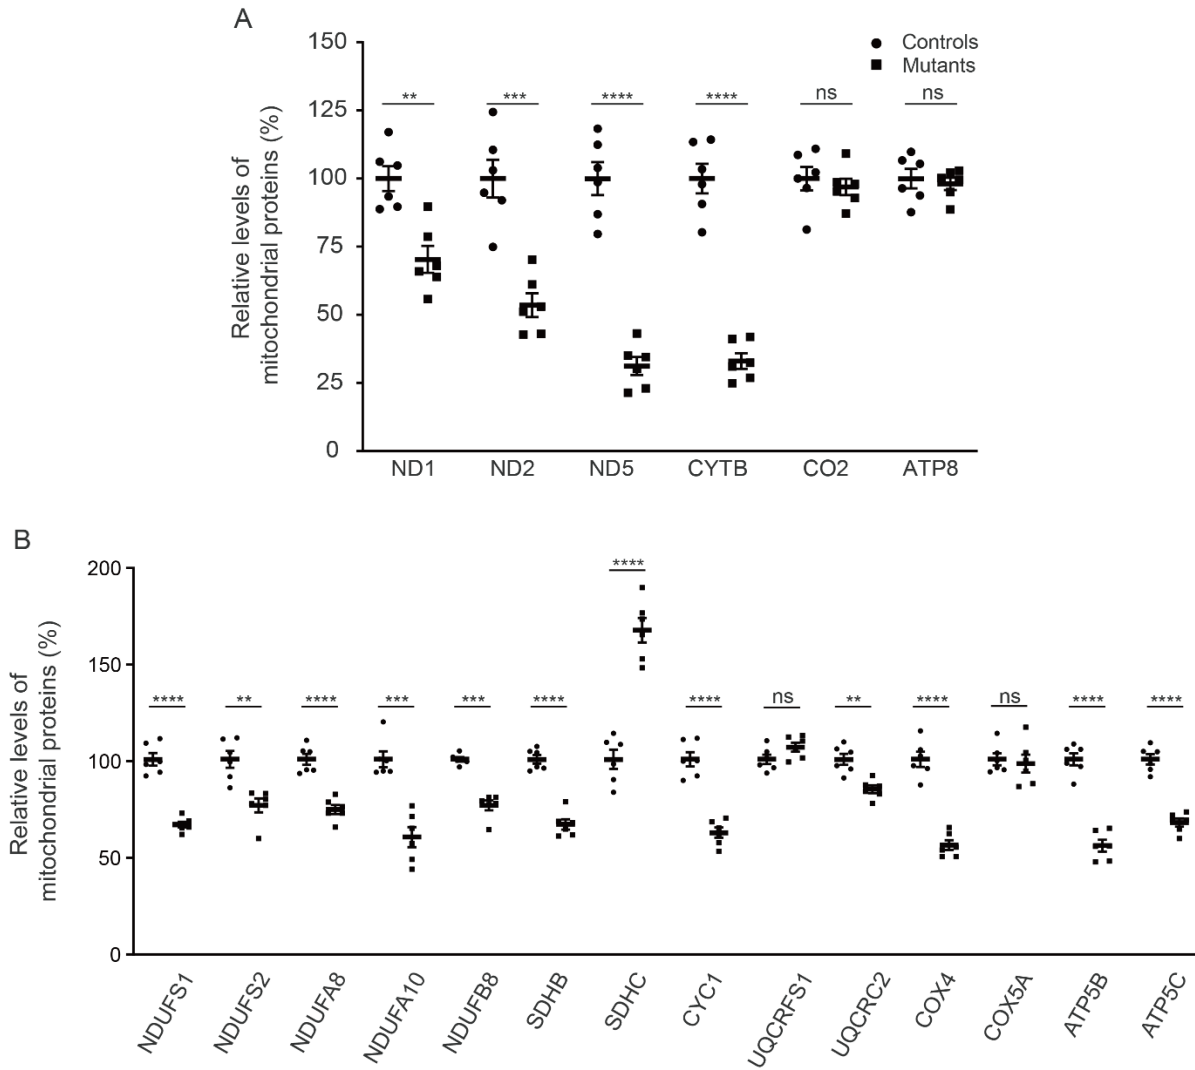

**Supplemental Figure 3 (related to Figure 4): Quantification of OXPHOS subunits.** (A) Quantification of mtDNA encoding subunits: ND1, ND2, ND5, CYTB, CO2 and ATP8 in mutant and control cell lines. (B) Quantification of nucleus-encoding subunits: NDUFS1, NDUFS2, NDUFA8, NDUFA10, NDUFB8, SDHB, SDHC, CYC1, UQCRC1, UQCRC2, COX4, COX5A, ATP5B and ATP5C in mutant and control cell lines. Data are as shown as mean  $\pm$  SEM of triplicates. *P* indicates the significance, according to the t-test, of the differences between mutant and control cell lines. \**P* < 0.05; \*\**P* < 0.01; \*\*\**P* < 0.001; \*\*\*\**P* < 0.0001; ns, not significant.

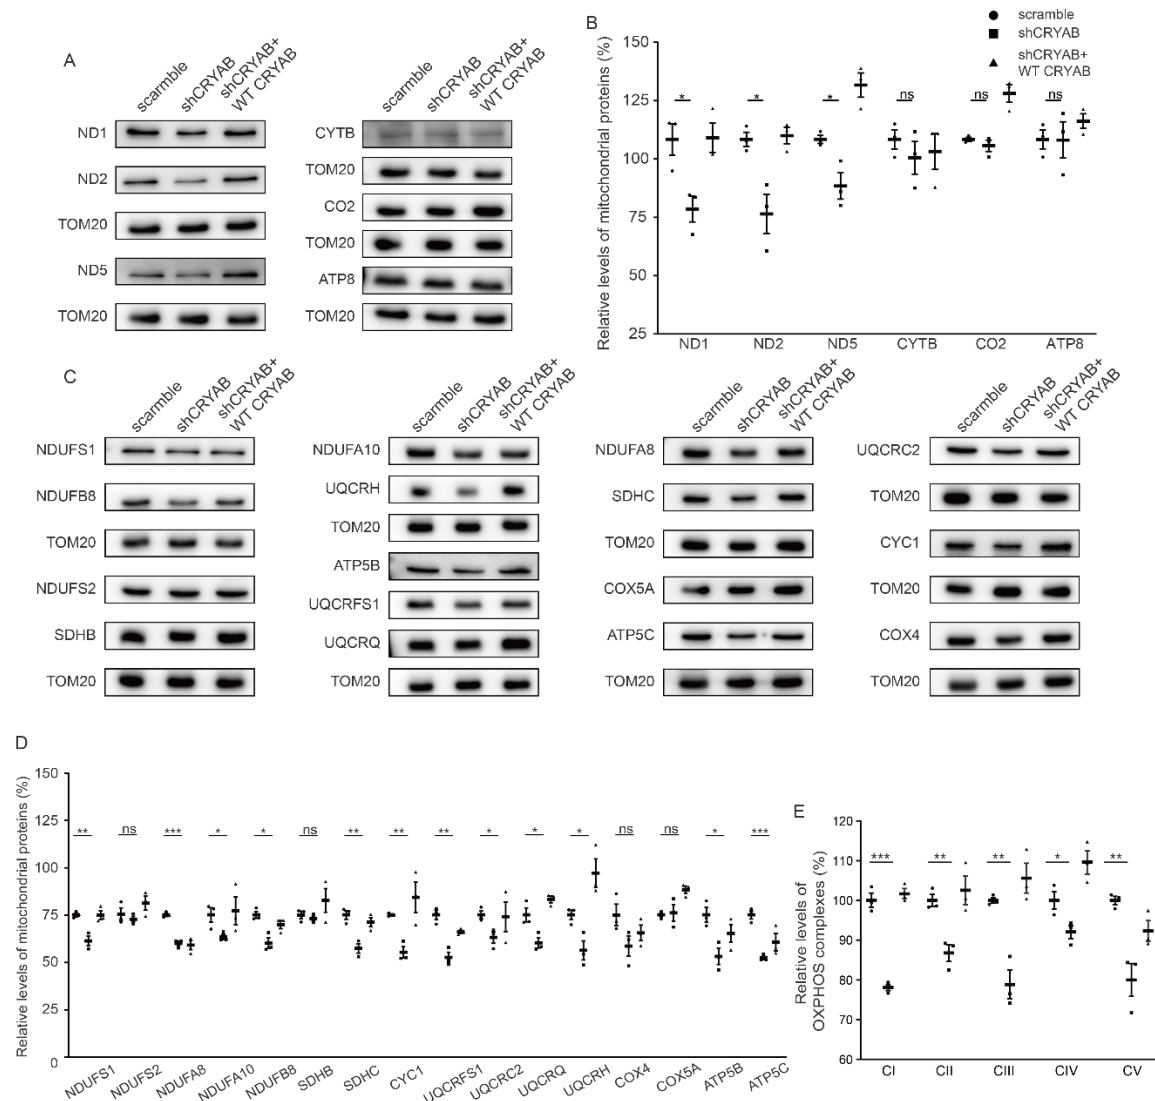

**Supplemental Figure 4 (related to Figure 4): Western blotting analysis of OXPHOS subunits from *CRYAB* knock-down cell line. (A and C)** Twenty micrograms of total cellular proteins from various cell lines were electrophoresed through a denaturing polyacrylamide gel, electroblotted, and hybridized with antibodies for 22 subunits of OXPHOS (6 encoded by mtDNA and 16 encoded by nuclear genes), and TOM20 as a loading control, respectively. (B and D) Quantification of mitochondrial proteins: 6 mtDNA-encoding subunits (B) and 16 nucleus-encoding subunits (D). Average relative each polypeptide content per cell was normalized to the average content per cell of TOM20 in each cell line. The values for the latter are expressed as percentages of the average values for the WT cell line. (E) Average levels of subunits from each complex of OXPHOS (8 of complexes I, 2 of II, 6 of III, 3 of IV, and 3 of V). The calculations were based on three independent determinations. Data are as shown as mean  $\pm$  SEM of triplicates. \* $P < 0.05$ ; \*\* $P < 0.01$ ; \*\*\* $P < 0.001$ ; \*\*\*\* $P < 0.0001$ ; ns, not significant.

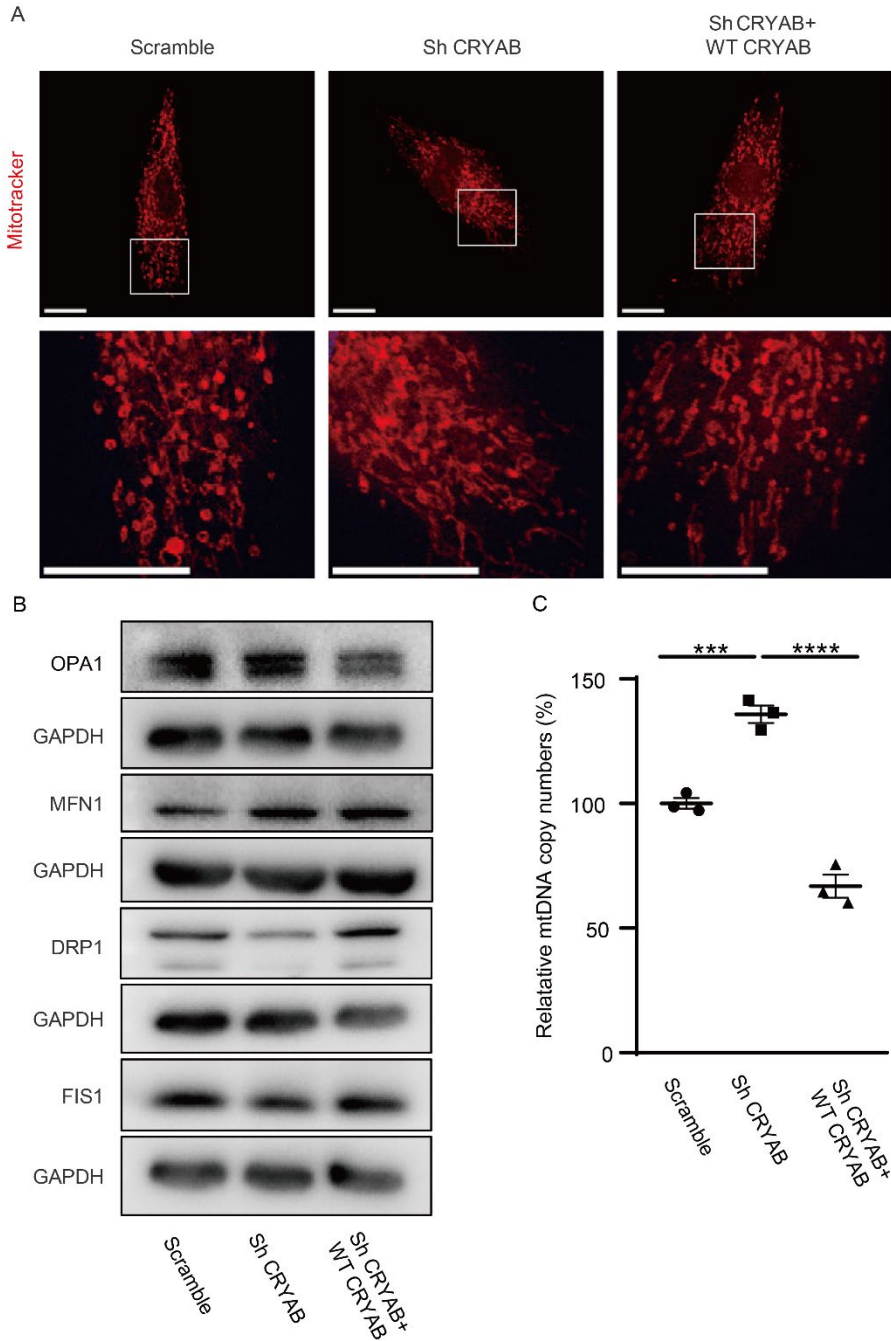

**Supplemental Figure 5 (related to Figure 4):** Assessment of mitochondrial dynamics and mtDNA contents of CRYAB knock-down cell lines. (A) Mitochondria from CRYAB knock-down cell lines were visualized by immunofluorescent staining with MitoTracker Red. Scale bar = 20μm. (B) Western blot analysis of mitochondrial fusion-associated proteins (MFN1, OPA1) and mitochondrial fission-associated proteins (DRP1, FIS1) among CRYAB knock-down cell lines, with GAPDH as a loading control. (C) Measurement of mtDNA contents by qPCR. Mitochondrial DNAs from mutant and control cell lines were normalized to  $\beta$ -actin encoded by nuclear gene (71). The calculations were based on three independent experiments. Data are as shown as mean  $\pm$  SEM of triplicates. *P* indicates the significance, \**P*<0.05, \*\**P*<0.01, \*\*\**P*<0.001; ns, no statistically significant by one-way ANOVA followed by Bonferroni's post hoc test.

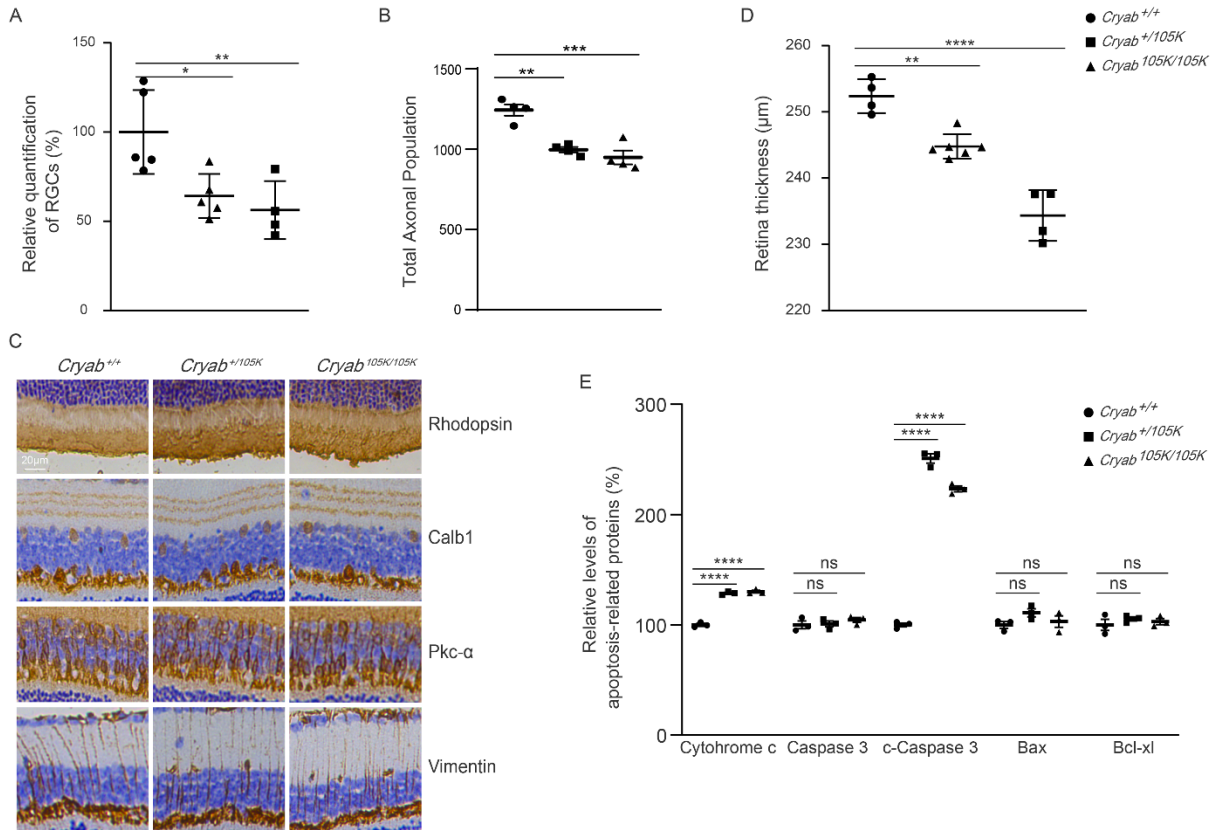

**Supplemental Figure 6 (related to Figure 5 and 6):** (A) Relative quantification of retinal ganglion cells. (B) Axonal counts from mice optic nerve cross-section of *Cryab*<sup>+/+</sup>, *Cryab*<sup>+/-105K</sup> and *Cryab*<sup>105K/105K</sup>. Five points in each nerve were photographed using a 100× objective lens. One picture in each set was excluded based on highest degree of longitudinally arranged axonal fibers. Four remaining pictures were manually counted. N=4. (C) Immunohistochemistry of mouse retina. Rhodopsin<sup>+</sup> for rod photoreceptor, Calb1<sup>+</sup> for horizontal cells, Pkc-α<sup>+</sup> for bipolar cells, and Vimentin<sup>+</sup> for Müller cells. (D) Quantification of mouse retinal thickness. (E) Quantification of apoptosis-related proteins. The calculations were based on three independent determinations. Data are as shown as mean ± SEM of triplicates. *P* indicates the significance, \**P*<0.05, \*\**P*<0.01, \*\*\**P*<0.001; ns, no statistically significant by one-way ANOVA followed by Bonferroni's post hoc test.

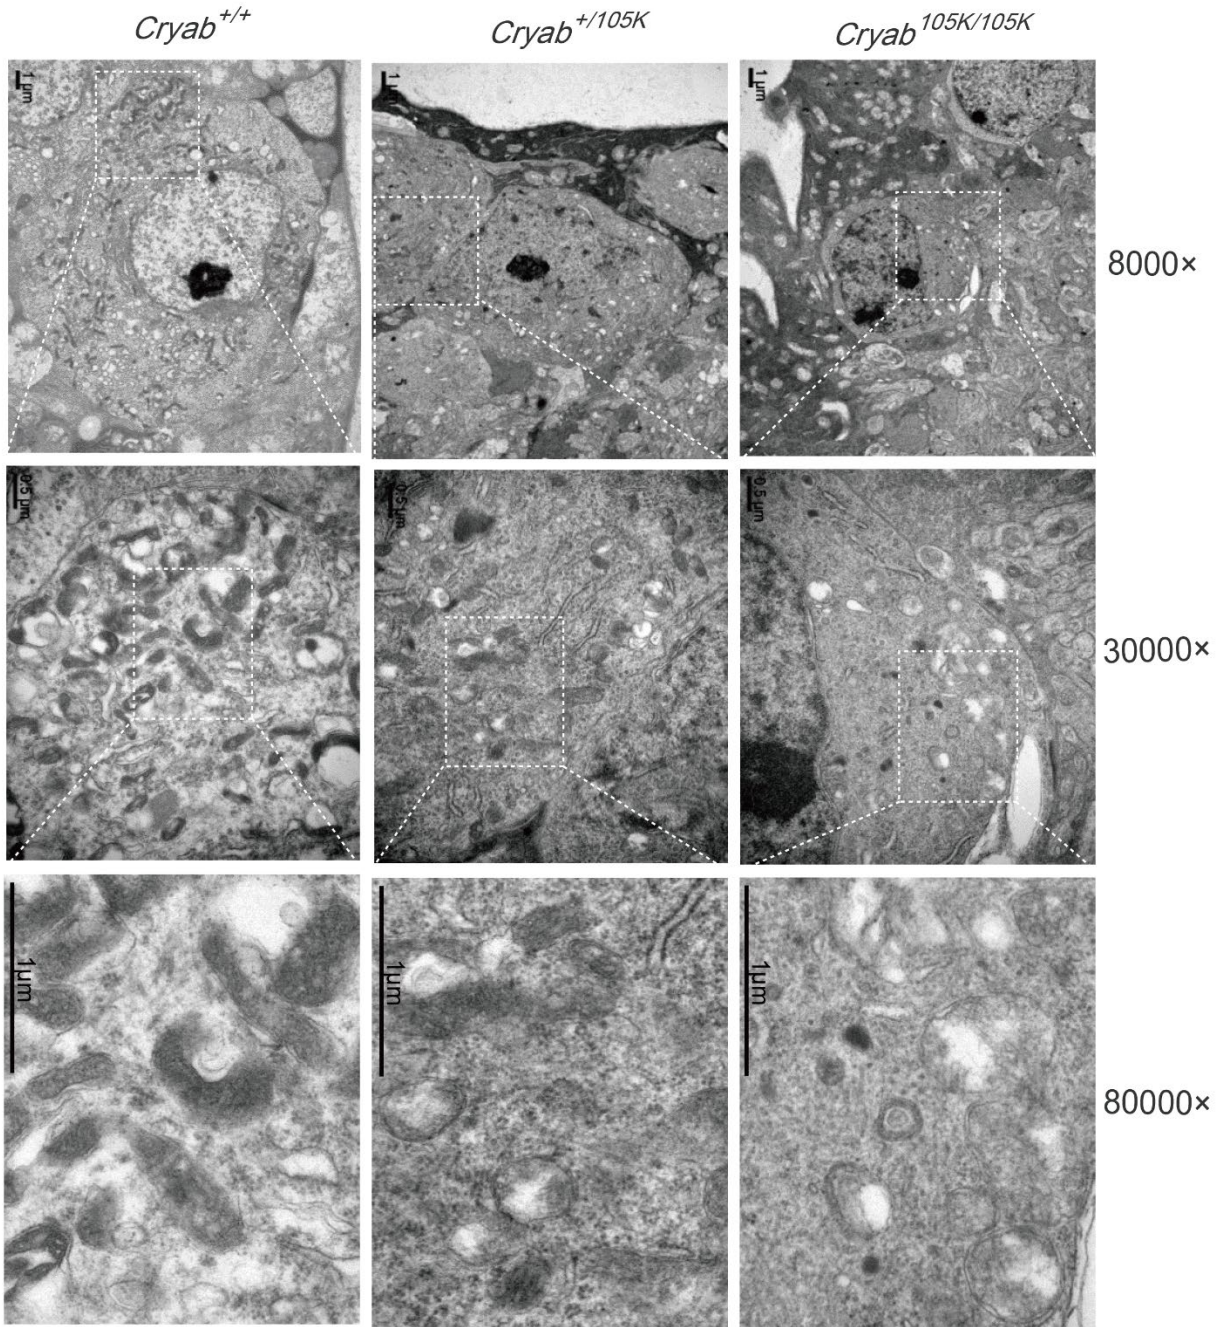

**Supplemental Figure 7 (related to Figure 5 and 6):** Mitochondrial morphologies in RGCs from WT and MT mice at 8 weeks of age by transmission electron microscopy. Ultrathin sections were visualized with 8000×, 30000×, and 80000× magnifications. The white rectangular dashed frame is the enlarged area. Scale bars: 1 μm.

Supplemental Table 1: mtDNA variants in 3 Han Chinese probands with optic atrophy

| Gene     | Position | Replacement | AA change | Conservation (H/B/M/X)* | CRS† | WZ1303 III-7 | TZ008 III-1 | TZ206 III-1 | Previously Reported‡ |
|----------|----------|-------------|-----------|-------------------------|------|--------------|-------------|-------------|----------------------|
| D-loop   | 73       | A-G         |           |                         | A    | G            | G           | G           | Yes                  |
|          | 150      | C-T         |           |                         | C    | T            |             |             | Yes                  |
|          | 210      | A-G         |           |                         | A    |              | G           |             | Yes                  |
|          | 249      | del A       |           |                         | A    |              |             | del         | Yes                  |
|          | 263      | A-G         |           |                         | A    | G            | G           | G           | Yes                  |
|          | 310      | T-TC        |           |                         | T    | TC           | TC          | TC          | Yes                  |
|          | 489      | T-C         |           |                         | T    | C            |             |             | Yes                  |
|          | 16093    | T-C         |           |                         | T    |              |             | C           | Yes                  |
|          | 16129    | G-A         |           |                         | G    |              |             | A           | Yes                  |
|          | 16140    | T-C         |           |                         | T    |              | C           |             | Yes                  |
|          | 16164    | A-G         |           |                         | A    | G            |             | G           | Yes                  |
|          | 16172    | T-C         |           |                         | T    | C            |             | C           | Yes                  |
|          | 16182    | A-C         |           |                         | A    | C            |             |             | Yes                  |
|          | 16183    | A-C         |           |                         | A    | C            | C           |             | Yes                  |
|          | 16189    | T-C         |           |                         | T    | C            | C           |             | Yes                  |
|          | 16304    | T-C         |           |                         | T    |              |             | C           | Yes                  |
|          | 16399    | A-G         |           |                         | A    |              |             | G           | Yes                  |
|          | 16519    | T-C         |           |                         | T    |              | C           | C           | Yes                  |
| 12S rRNA | 709      | G-A         |           | G/A/A/-                 | G    |              | A           |             | Yes                  |
|          | 750      | A-G         |           | A/A/A/-                 | A    | G            | G           | G           | Yes                  |
|          | 752      | C-T         |           | C/C/A/-                 | C    | T            |             |             | Yes                  |
|          | 1107     | T-C         |           | T/C/T/T                 | T    | C            |             |             | Yes                  |
|          | 1438     | A-G         |           | A/A/A/G                 | A    |              | G           | G           | Yes                  |
| 16S rRNA | 2706     | A-G         |           | A/G/A/A                 | A    | G            | G           | G           | Yes                  |
|          | 3537     | A-G         | Syn       |                         | A    |              | G           |             | Yes                  |
| MT-ND1   | 3528     | C-T         | Syn       |                         | C    | T            |             |             | Yes                  |
|          | 3970     | C-T         | Syn       |                         | C    |              |             | T           | Yes                  |
| MT-ND2   | 4086     | C-T         | Syn       |                         | C    |              |             | T           | Yes                  |
|          | 4769     | A-G         | Syn       |                         | A    | G            | G           | G           | Yes                  |
|          | 4883     | C-T         | Syn       |                         | C    | T            |             |             | Yes                  |
|          | 5178     | C-A         | Leu-Met   | L/T/T/T                 | C    | A            |             |             | Yes                  |
|          | 5301     | A-G         | Ile-Val   | I/L/M/L                 | A    | G            |             |             | Yes                  |
|          | 6392     | T-C         | Syn       |                         | T    |              |             | C           | Yes                  |
| MT-COX1  | 6960     | C-T         | Syn       |                         | C    |              | T           |             | Yes                  |
|          | 6962     | G-A         | Syn       |                         | G    |              |             | A           | Yes                  |
|          | 7028     | C-T         | Syn       |                         | C    | T            |             |             | Yes                  |
|          | 8291-9   | del         |           |                         |      |              | del         |             | Yes                  |
| MT-ATP6  | 8584     | G-A         | Ala-Thr   | A/V/V/I                 | G    |              | A           |             | Yes                  |
|          | 8701     | A-G         | Thr-Ala   | T/S/L/Q                 | A    | G            |             |             | Yes                  |
|          | 8860     | A-G         | Thr-Ala   | T/A/A/T                 | A    | G            | G           | G           | Yes                  |
|          | 9053     | G-A         | Ser-Asp   | S/G/G/T                 | G    |              |             | A           | Yes                  |
| MT-COX3  | 9180     | A-G         | Syn       |                         | A    | G            |             |             | Yes                  |
|          | 9540     | T-C         | Syn       |                         | T    | C            |             |             | Yes                  |
|          | 9548     | G-A         | Syn       |                         | G    |              |             | A           | Yes                  |
|          | 9950     | T-C         | Syn       |                         | T    |              | C           |             | Yes                  |
|          | 10310    | G-A         | Syn       |                         | G    |              |             | A           | Yes                  |
|          | 10325    | G-A         | Syn       |                         | G    |              | A           |             | Yes                  |
| MT-ND3   | 10397    | A-G         | Syn       |                         | A    | G            |             |             | Yes                  |
|          | 10398    | A-G         | Thr-Ala   | T/T/T/A                 | A    | G            | G           |             | Yes                  |
| MT-ND4   | 10400    | C-T         |           |                         | C    | T            |             |             | Yes                  |
|          | 10873    | T-C         | Syn       |                         | T    | C            |             |             | Yes                  |
|          | 11380    | A-G         | Syn       |                         | A    |              |             | G           | Yes                  |
|          | 11719    | G-A         | Syn       |                         | G    | A            | A           | A           | Yes                  |
|          | 11944    | T-C         | Syn       |                         | T    | C            |             |             | Yes                  |
|          | 12026    | A-G         | Ile-Val   | I/I/M/L                 | A    | G            |             |             | Yes                  |
| MT-ND5   | 12705    | C-T         | Syn       |                         | C    | T            |             |             | Yes                  |
|          | 12882    | C-T         | Syn       |                         | C    |              |             | T           | Yes                  |
|          | 13759    | G-A         | Ala-Thr   | A/T/T/I                 | G    |              |             | A           | Yes                  |
|          | 13928    | G-C         | Ser-Thr   | S/T/S/T                 | G    |              | C           |             | Yes                  |
| MT-CYB   | 14766    | C-T         | Thr-Ile   | T/S/T/S                 | C    | T            | T           | T           | Yes                  |
|          | 14783    | T-C         | Syn       |                         | T    | C            |             |             | Yes                  |
|          | 15043    | G-A         | Syn       |                         | G    | A            |             |             | Yes                  |
|          | 15235    | A-G         | Syn       |                         | A    |              | G           |             | Yes                  |
|          | 15301    | G-A         | Syn       |                         | G    | A            |             |             | Yes                  |
|          | 15326    | A-G         | Thr-Ala   | T/M/I/I                 | A    | G            | G           | G           | Yes                  |

# Conservation among 4 species: *Homo sapiens* (H), *Bos taurus* (B), *Mus musculus* (M) and *Xenopus laevis* (X);

‡ CRS: Cambridge reference sequence;

† See online mitochondrial genome database: <http://www.mitomap.org>.

Supplemental Table 2 (related to Figure 1). Summary of clinical data for members of 3 Han Chinese families with optic atrophy

| Subject       | Gender | Age of test (year) | Age of onset (year) | Vision acuity (Right/Left eyes) | Level of vision impairment | <i>CRYAB</i> c.313G>A mutation |
|---------------|--------|--------------------|---------------------|---------------------------------|----------------------------|--------------------------------|
| WZ1303-I-1    | M      | 82                 | /                   | 1.1/1.2                         | normal                     | +/+                            |
| WZ1303-I-2    | F      | 80                 | 21                  | 0.05/0.08                       | moderate                   | +/-                            |
| WZ1303-II-1   | M      | 62                 | /                   | 1.2/1                           | normal                     | +/+                            |
| WZ1303-II-2   | F      | 61                 | 24                  | 0.1/0.1                         | moderate                   | +/-                            |
| WZ1303-II-3   | M      | 58                 | /                   | 1.1/1.3                         | normal                     | +/+                            |
| WZ1303-II-4   | F      | 57                 | 20                  | 0.1/0.2                         | mild                       | +/-                            |
| WZ1303-II-5   | M      | 54                 | 22                  | 0.08/0.08                       | moderate                   | +/-                            |
| WZ1303-II-6   | M      | 49                 | 18                  | 0.1/0.2                         | mild                       | +/-                            |
| WZ1303-II-7   | F      | 48                 | /                   | 1.0/1.1                         | normal                     | +/+                            |
| WZ1303-II-8   | M      | 47                 | /                   | 1.0/1.2                         | normal                     | +/+                            |
| WZ1303-II-9   | F      | 45                 | /                   | 1.3/1.1                         | normal                     | +/+                            |
| WZ1303-III-1  | M      | 39                 | /                   | 1.0/1.1                         | normal                     | +/+                            |
| WZ1303-III-2  | F      | 38                 | 14                  | 0.1/0.08                        | moderate                   | +/-                            |
| WZ1303-III-3  | F      | 35                 | /                   | 1.2/1.0                         | normal                     | +/+                            |
| WZ1303-III-4  | M      | 33                 | /                   | 1.0/1.3                         | normal                     | +/+                            |
| WZ1303-III-5  | F      | 31                 | /                   | 1.0/1.0                         | normal                     | +/+                            |
| WZ1303-III-6  | F      | 28                 | 21                  | 0.1/0.2                         | mild                       | +/-                            |
| WZ1303-III-7  | M      | 26                 | 17                  | 0.1/0.1                         | moderate                   | +/-                            |
| WZ1303-III-8  | M      | 34                 | 19                  | 0.2/0.2                         | mild                       | +/-                            |
| WZ1303-III-9  | M      | 32                 | /                   | 1.1/1.0                         | normal                     | +/+                            |
| WZ1303-III-10 | M      | 27                 | /                   | 1.1/1.1                         | normal                     | +/+                            |
| WZ1303-III-11 | F      | 24                 | /                   | 1.0/1.2                         | normal                     | +/+                            |
| WZ1303-III-12 | M      | 20                 | 15                  | 0.1/0.2                         | mild                       | +/-                            |
| WZ1303-III-13 | M      | 24                 | /                   | 1.3/1.3                         | normal                     | +/+                            |
| WZ1303-III-14 | F      | 22                 | /                   | 1.0/1.0                         | normal                     | +/+                            |
| WZ1303-III-15 | M      | 21                 | /                   | 1.1/1.0                         | normal                     | +/+                            |
| WZ1303-IV-1   | M      | 26                 | 14                  | 0.2/0.1                         | mild                       | +/-                            |
| WZ1303-IV-2   | M      | 24                 | /                   | 1.2/1.1                         | normal                     | +/+                            |
| WZ1303-IV-3   | M      | 22                 | /                   | 1.1/1.0                         | normal                     | +/+                            |
| WZ1303-IV-4   | M      | 13                 | /                   | 1.0/1.3                         | normal                     | +/+                            |
| TZ008- I-1    | M      | 68                 | 20                  | 0.1/0.2                         | mild                       | +/-                            |
| TZ008- I-2    | F      | 67                 | /                   | 1.0/1.0                         | normal                     | +/+                            |
| TZ008-II-1    | M      | 47                 | 19                  | 0.2/0.1                         | mild                       | +/-                            |
| TZ008-II-2    | F      | 45                 | /                   | 1.1/1.0                         | normal                     | +/+                            |
| TZ008-II-3    | F      | 45                 | /                   | 1.0/1.2                         | normal                     | +/+                            |
| TZ008-II-4    | M      | 43                 | /                   | 1.1/1.2                         | normal                     | +/+                            |
| TZ008-III-1   | F      | 22                 | 21                  | 0.2/0.1                         | mild                       | +/-                            |
| TZ206- I-1    | M      | 65                 | 19                  | 0.1/0.2                         | mild                       | +/-                            |
| TZ206- I-2    | F      | 63                 | /                   | 1.0/1.1                         | normal                     | +/+                            |
| TZ206- II-1   | M      | 46                 | /                   | 1.1/1.1                         | normal                     | +/+                            |
| TZ206- II-2   | F      | 45                 | 20                  | 0.1/0.2                         | mild                       | +/-                            |
| TZ206-III-1   | M      | 20                 | 18                  | 0.2/0.2                         | mild                       | +/-                            |

F= female; M= male; The degree of visual impairment was defined according to the visual acuity as follows: normal > 0.3, mild=0.3-0.1; moderate = 0.1-0.05; severe = 0.05-0.02; and profound <0.02

Supplemental Table 3. Summary of exome sequencing data for four members of WZ1303 family

| Categories                                   | II-1     | II-8     | II-2     | III-7    |
|----------------------------------------------|----------|----------|----------|----------|
| Number of genomic positions for calling SNPs | 44078277 | 43686053 | 43948447 | 41839201 |
| Number of high-confidence genotypes          | 40966044 | 40410162 | 41062675 | 38245214 |
| Total number of SNPs                         | 128413   | 107379   | 118940   | 110364   |
| Synonymous –coding                           | 12053    | 12107    | 12141    | 12027    |
| Missense                                     | 11472    | 11653    | 11747    | 11591    |
| Nonsense                                     | 108      | 118      | 109      | 103      |
| Readthrough                                  | 12       | 10       | 8        | 12       |
| Splice site                                  | 175      | 177      | 185      | 176      |
| Intron                                       | 38510    | 36945    | 37822    | 37527    |
| 5' UTR                                       | 4086     | 3725     | 3775     | 3851     |
| 3' UTR                                       | 7888     | 6915     | 7495     | 7418     |
| Intergenic                                   | 15898    | 15121    | 15984    | 15559    |
| Homozygous                                   | 74710    | 61588    | 68904    | 63228    |
| Heterozygous                                 | 53703    | 45791    | 50036    | 47136    |
| Frame error                                  | 0        | 0        | 0        | 0        |

Supplemental Table 4. Oligonucleotides for Sanger sequence analysis of *CRYAB* gene

| Primer names  | Sequence (5'-3')       | Description |
|---------------|------------------------|-------------|
| CRYAB exon1-F | GAGCCACATAGAACGAAAG    | Sequencing  |
| CRYAB exon1-R | ATAAATGGGATACAGAGGACTA | Sequencing  |
| CRYAB exon2-F | AAGCCCTACGAGGAAACA     | Sequencing  |
| CRYAB exon2-R | TGTTATGGCTTGGGACTG     | Sequencing  |
| CRYAB exon3-F | TCAGAACCTGTGCGTCAA     | Sequencing  |
| CRYAB exon3-R | TCCTGTTTATTGCCCTTG     | Sequencing  |

Supplemental Table 5. Key Resources table

| REAGENT or RESOURCE     | SOURCE                    | IDENTIFIER  |
|-------------------------|---------------------------|-------------|
| <b>Antibodies</b>       |                           |             |
| CRYAB                   | Cell Signaling Technology | 45844S      |
| GAPDH                   | proteintech               | 10494-1-AP  |
| DDDDK-Tag               | abclonal                  | AE005       |
| TOM20                   | abclonal                  | A19403      |
| HA-Tag                  | abclonal                  | AE008       |
| VDAC1/Porin             | proteintech               | 55259-1-AP  |
| Cytochrome <i>c</i>     | proteintech               | 10993-1-AP  |
| BAX                     | proteintech               | 50599-2-Ig  |
| BCL-XL                  | proteintech               | 26967-1-AP  |
| Caspase 9               | proteintech               | 10380-1-AP  |
| ND1                     | proteintech               | 19703-1-AP  |
| ND2                     | proteintech               | 19704-1-AP  |
| ND5                     | proteintech               | 55410-1-AP  |
| CYTb                    | proteintech               | 55090-1-AP  |
| CO2                     | proteintech               | 55070-1-AP  |
| ATP8                    | proteintech               | 29398-1-AP  |
| NDUFS1                  | proteintech               | 12444-1-AP  |
| NDUFS2                  | abclonal                  | A12858      |
| NSUFA8                  | abclonal                  | A12118      |
| NDUFA10                 | abclonal                  | A10123      |
| NDUFB8                  | proteintech               | 14794-1-AP  |
| SDHB                    | proteintech               | 10620-1-AP  |
| SDHC                    | abcam                     | Ab155999    |
| CYC1                    | proteintech               | 10242-1-AP  |
| UQCRC1                  | proteintech               | 18443-1-AP  |
| UQCRC2                  | proteintech               | 14742-1-AP  |
| UQCRCQ                  | proteintech               | 14975-1-AP  |
| UQCRCR                  | abclonal                  | A9395       |
| COX4                    | proteintech               | 11242-1-AP  |
| COX5A                   | proteintech               | 11448-1-AP  |
| ATP5A                   | proteintech               | 14676-1-AP  |
| ATP5B                   | proteintech               | 17247-1-AP  |
| ATP5C                   | proteintech               | 10910-1-AP  |
| GAPDH                   | GOOD HRER                 | AB-M-M001   |
| Bm-3a                   | Santa Cruz                | sc-8429     |
| $\beta$ III-tubulin     | Abcam                     | ab18207     |
| Caspase 3               | Proteintech               | 19677-1-AP  |
| Cleaved-Caspase 3       | Affinity                  | AF7022      |
| OPA1                    | Abclonal                  | A9833       |
| MFN1                    | Proteintech               | 13798-1-AP  |
| DRP1                    | Proteintech               | 10242-1-AP  |
| FIS1                    | Proteintech               | 12957-1-AP  |
| <b>Software</b>         |                           |             |
| Microsoft-Excel         | Microsoft                 |             |
| GraphPad Prism9         | GraphPad Software         |             |
| <b>Oligonucleotides</b> |                           |             |
| Primers                 | This paper                | See Table 4 |
